1     **Polymorphism analyses and protein modelling inform on functional specialization of Piwi**  
2                     **clade genes in the arboviral vector *Aedes albopictus***

3  
4     Short Title: Piwi clade genes of *Aedes albopictus*

5  
6     Michele Marconcini<sup>1</sup>, Luis Hernandez<sup>1</sup>, Giuseppe Iovino<sup>1</sup>, Vincent Houé<sup>2</sup>, Federica Valerio<sup>1</sup>,  
7     Umberto Palatini<sup>1</sup>, Elisa Pischedda<sup>1</sup>, Jacob Crawford<sup>3</sup>, Rebeca Carballar-Lejarazu<sup>1\*</sup>, Lino Ometto<sup>1</sup>,  
8     Federico Forneris<sup>1</sup>, Anna-Bella Failloux<sup>2</sup>, Mariangela Bonizzoni<sup>1&</sup>

9  
10    <sup>1</sup> Department of Biology and Biotechnology, University of Pavia, Italy

11    <sup>2</sup> Arbovirus and Insect Vectors Units, Department of Virology, Institut Pasteur, Paris, France

12    <sup>3</sup> Verily Life Sciences LLC, San Francisco, USA

13    \* Current Address: University of California, Irvine, Department of Molecular Biology and  
14    Biochemistry, California, USA

15    & Corresponding author

16  
17    **Keywords**

18    *Aedes albopictus*, piRNA pathway, arbovirus, development

19

## Abstract

20

21 Current knowledge of the piRNA pathway is based mainly on studies on the model organism  
22 *Drosophila melanogaster*, where three proteins of the Piwi subclade of the Argonaute family interact  
23 with PIWI-interacting RNAs to silence transposable elements in gonadal tissues. In mosquito species  
24 that transmit epidemic arboviruses such as the Dengue and Chikungunya viruses, *Piwi* clade genes  
25 underwent expansion, are also expressed in the soma, and code for proteins that may elicit antiviral  
26 functions and crosstalk with other proteins of recognized antiviral mechanisms. These observations  
27 underline the importance of expanding our knowledge of the piRNA pathway beyond *D.*  
28 *melanogaster*.

29 Here we focus on the emerging arboviral vector *Aedes albopictus* and we couple traditional  
30 approaches of expression and adaptive evolution analyses with most current computational  
31 predictions of protein structure to study evolutionary divergence among Piwi clade proteins.  
32 Superposition of protein homology models indicate high structure similarity among all Piwi proteins,  
33 with high levels of amino acid conservation in the inner regions devoted to RNA binding. On the  
34 contrary, solvent-exposed surfaces showed low conservation, with several sites under positive  
35 selection. Expression profiles of *Piwi* transcripts during mosquito development and after infection  
36 with the Dengue 1 virus showed a concerted elicitation of all *Piwi* transcripts during viral  
37 dissemination, while the maintenance of infection primarily relied on the expression of *Piwi5*. In  
38 contrast, establishment of persistent infection by the Chikungunya virus is accompanied by an  
39 increased expression of all *Piwi* genes, particularly *Piwi4* and, again, *Piwi5*. Overall these results are  
40 consistent with functional specialization and a general antiviral role for *Piwi5*. Experimental  
41 evidences of sites under positive selection in *Piwi1/3*, *Piwi4* and *Piwi6*, further provide useful  
42 knowledge to design tailored functional experiments.

43

44

## Author summary

45 Argonautes are ancient proteins involved in many cellular processes, including innate  
46 immunity. Early in eukaryote evolution, Argonautes separated into Ago and Piwi clades, which  
47 maintain a dynamic evolutionary history with frequent duplications and losses. The use of *Drosophila*  
48 *melanogaster* as a model organism proved fundamental to understand the function of Argonautes.  
49 However, recent studies showed that the patterns and observations made in *D. melanogaster*,  
50 including the number of Argonautes, their expression profile and their function, are a rarity among  
51 Dipterans.

52 In vectors of epidemic arboviruses such as Dengue and Chikungunya viruses, *Piwi* genes  
53 underwent expansion, are expressed in the soma, and some of them appear to have antiviral  
54 functions. Besides being an important basic question, the identification of which (and how) *Piwi*  
55 genes have antiviral functions may be used for the development of novel genetic-based strategies  
56 of vector control. Here we coupled population genetics models with computational predictions of  
57 protein structure and expression analyses to investigate the evolution and function of *Piwi* genes of  
58 the emerging vector *Aedes albopictus*. Our data support a general antiviral role for *Piwi5*. Instead,  
59 the detection of complex expression profiles with the presence of sites under positive selection in  
60 *Piwi1/3*, *Piwi4* and *Piwi6* requires tailored functional experiments to clarify their antiviral role.

61

## Introduction

62  
63  
64  
65  
66  
67  
68  
69  
70  
71  
72  
73  
74  
75  
76  
77  
78  
79  
80  
81  
82  
83  
84  
85  
86  
87  
88

First discovered for their role in plant developmental, proteins of the Argonaute family have been found in all domains of life, where they are essential for a wide variety of cellular processes, including innate immunity [1,2].

Recent studies provided evidence of evolutionary expansion and functional divergence of Argonautes in Dipterans, including examples in both the Ago and Piwi subclades [3]. Differences in function and copy number have also been found in other taxa such as nematodes [4], oomycetes [5] and higher plants [6], indicating a dynamic evolutionary history of this protein family. In eukaryotes, Argonautes are key components of the RNA interference (RNAi) mechanisms, which can be distinguished in small interfering RNA (siRNA), microRNA (miRNA) and the PIWI-interacting RNA (piRNA) pathways.

The siRNA pathway is the cornerstone of antiviral defense in insects. The canonical activity of this pathway is the Argonaute 2 (Ago2)-dependent cleavage of viral target sequences. Ago2 is guided to its target through an RNA-induced silencing complex (RISC) loaded with 21-nucleotide (nt)-long siRNAs. siRNAs are produced from viral double-strand RNAs intermediates by the RNAase-III endonuclease activity of Dicer-2 (Dcr2) and recognize the target based on sequence complementarity [7]. Dcr2 also possesses a DExD/H helicase domain that mediates the synthesis of viral DNA (vDNA) fragments [8], which appear to further modulate antiviral immunity [8]. vDNA fragments are synthesized in both circular and linear forms, in complex arrangements with sequences from retrotransposons, but details of their mode of action have not been elucidated yet [8,9]. We and others recently showed that the genomes of *Aedes spp.* mosquitoes harbor fragmented viral sequences, which are integrated next to transposon sequences, are enriched in piRNA clusters and produced PIWI-interacting RNAs (piRNAs) [10,11]. The similar organization between vDNAs and viral integrations, along with the production of piRNAs of viral origin (vpiRNAs) following arboviral infection of *Aedes spp.* mosquitoes, led to the hypothesis that the piRNA pathway functions cooperatively with the siRNA pathway in the acquisition of tolerance to infection [10,12,13].

89 Current knowledge on the piRNA pathway in insects is based mainly on studies on *Drosophila*  
90 *melanogaster*, where three proteins of the Piwi subclade, namely Argonaute-3 (AGO3), PIWI and  
91 Aubergine (AUB), interact with piRNAs to silence transposable elements (TEs) in gonadal tissues  
92 [14]. Interestingly, the piRNA pathway of *D. melanogaster* does not have antiviral activity and no viral  
93 integrations have been detected [15]. Additional differences exist between the piRNA pathway of *D.*  
94 *melanogaster* and that of mosquitoes, suggesting that *D. melanogaster* cannot be used as a model  
95 to unravel the molecular crosstalk between the siRNA and piRNA pathways leading to antiviral  
96 immunity in *Aedes* spp. mosquitoes. For instance, in *Aedes aegypti*, Piwi subclade has undergone  
97 expansion with seven proteins (i.e. Ago3, Piwi2, Piwi3, Piwi4, Piwi5, Piwi6 and Piwi7), which are  
98 alternatively expressed in somatic and germline cells and interact with both endogenous piRNAs  
99 and vpiRNAs [12,16,17]. Gonadal- or embryonic-specific expression is found for *Piwi1/3* and *Piwi7*,  
100 respectively [16], while *Ago3*, *Piwi4*, *Piwi5* and *Piwi6* are highly expressed in the soma and in the  
101 *Ae. aegypti* cell line Aag2 and contribute to the production of transposon-derived piRNAs [16,18].  
102 Ago3 and Piwi5 also regulate biogenesis of piRNAs from the replication-dependent histone gene  
103 family [19]. Production of vpiRNAs is dependent on Piwi5 and Ago3 during infection of Aag2 cells  
104 with the *Alphavirus* CHIKV, Sindbis and Semliki Forest viruses (SFV), but relies also on Piwi6  
105 following infection with the *Flavivirus* DENV2 [18,20–22]. Piwi4 does not bind piRNAs and its knock-  
106 down does not alter vpiRNA production upon infection of Aag2 cells with either SFV or DENV2  
107 [18,23]. On the contrary Piwi4 coimmunoprecipitate with Ago2, Dcr2, Piwi5, Piwi6 and Ago3,  
108 suggesting a bridging role between the siRNA and piRNA pathways [21]. Despite these studies  
109 support an antiviral role for the piRNA pathway in *Aedes* spp. mosquitoes, a major challenge is to  
110 uncover the distinct physiological roles of Piwi proteins, if any. In duplicated genes, the presence of  
111 sites under positive selection is usually a sign of the acquisition of novel functions [24]. Additionally,  
112 under the “arm-race theory”, rapid evolution is expected for genes with immunity functions because  
113 their products should act against fast evolving viruses [25].

114 Besides being an important basic question, the understanding of functional divergence  
115 among Piwi proteins has applied perspectives for the development of novel genetic-based methods

116 to control vector transmission. This is particularly relevant for mosquitos borne viruses, as several  
117 *Aedes* spp. species are expanding their spatial distribution and may contribute to disease outbreaks.

118 In recent years, the Asian tiger mosquito *Aedes albopictus* has emerged as a novel global  
119 arboviral threat, invading every continent except Antarctica from its native home range of South East  
120 Asia [26]. Because this species is a competent vector for a number of arboviruses such as  
121 chikungunya (CHIKV), dengue (DENV), yellow fever (YFV) and Zika (ZIKV) viruses, its  
122 establishment in temperate regions of the world fostered the re-emergence or the new introduction  
123 of these arboviruses [27]. For instance, Chikungunya outbreaks occurred in Italy in 2007 and 2017  
124 [28,29]; France and Croatia suffered from autochthonous cases of Dengue and Chikungunya in  
125 several occasions since 2010 [30–33]; and dengue is re-emerging in some regions of the United  
126 States [34]. Despite its increasing public-health relevance, knowledge on *Ae. albopictus* biology and  
127 the molecular mechanisms underlying its competence to arboviruses are still limited in comparison  
128 to *Ae. aegypti*.

129 Here we elucidate the molecular organization, intraspecific polymorphism and expression of  
130 *Piwi* clade genes of *Ae. albopictus* in an evolutionary framework using a combination of molecular,  
131 population genomics and computational protein modelling approaches. We show that the genome  
132 of *Ae. albopictus* harbours seven *Piwi* genes, namely *Ago3*, *Piwi1/3*, *Piwi2*, *Piwi4*, *Piwi5*, *Piwi6* and  
133 *Piwi7*. For the first time in mosquitoes, we show sign of adaptive evolution in *Piwi1/3*, *Piwi4*, *Piwi5*  
134 and *Piwi6*, including sites in the MID and PAZ domains. Additionally, expression profiles during  
135 mosquito development and following infection with DENV or CHIKV support functional specialization  
136 of *Piwi* proteins, with a prominent and general antiviral role for the transcript of *Piwi5*.

137

## 138 Results

### 139 Seven *Piwi* genes are present in the genome of *Ae. albopictus*

140 Bioinformatic analyses of the current genome assemblies of *Ae. albopictus* (AaloF1) and the  
141 C6/36 cell line (canu\_80X\_arrow2.2), followed by copy number validation, confirmed the presence  
142 of seven *Piwi* genes (i.e. *Ago3*, *Piwi1/3*, *Piwi2*, *Piwi4*, *Piwi5*, *Piwi6* and *Piwi7*) in *Ae. albopictus* (S1

143 Table). Genomic DNA sequences were obtained for each exon-intron boundaries confirming in all  
144 *Piwi* genes the presence of the PAZ, MID and PIWI domains, the hallmarks of the Piwi subfamily of  
145 Argonaute proteins [35]. For *Ago3*, *Piwi1/3*, *Piwi2*, *Piwi4* and *Piwi6*, single transcript sequences that  
146 correspond to predictions based on the identified DNA sequences were retrieved (S1 Dataset).  
147 Sequencing results of the transcript from *Piwi5* showed a sequence 27 bp shorter than predicted on  
148 the reference genome, due to a 45bp gap followed by a 18b insertion, 110 and 333 bases after the  
149 ATG starting codon, respectively. This transcript still includes the PAZ, MID and PIWI domains. The  
150 presence of this transcript was further validated by northern-blot (Fig 1). For *Piwi7*, the transcript  
151 sequence also appears shorter than predicted (Fig 1). Alignment and phylogenetic analyses, in the  
152 context of currently annotated *Piwi* transcripts of Culicinae and Anophelinae mosquitoes, confirmed  
153 one-to-one orthologous pairing between *Ae. albopictus* *Piwi* gene transcripts and those of *Ae.*  
154 *aegypti* (S2 Table, S1 Fig). Interestingly, *Piwi5*, *Piwi6* and *Piwi7* transcripts group together and  
155 appear more similar to one of the two Aubergine-like transcripts annotated in different Anophelinae  
156 species than to *Aedes Piwi2*, *Piwi1/3* and *Piwi4* transcripts. Regarding the latter, *Piwi2* and *Piwi1/3*  
157 form a species-specific clade, rather than follow a speciation pattern. Independent duplication events  
158 in *Ae. aegypti* and *Ae. albopictus*, followed by convergent functional evolution, is unlikely if we  
159 consider the presence of orthologues in more distant species. Rather, the two genes, which based  
160 on *Ae. aegypti* chromosomal map on chromosome 1 and are ~20 kb apart [17], may be undergoing  
161 inter-locus gene conversion via nonreciprocal recombination, which result in between-loci  
162 homogenization.

### 163 ***Piwi* genes display high levels of polymorphism across populations and show signs** 164 **of adaptive evolution**

165 Across *Drosophila* phylogeny, genes of the piRNA pathway display elevated rates of adaptive  
166 evolution [36], with rapidly evolving residues not clustering at the RNA binding site, but being  
167 distributed across the proteins [3]. The RNA binding site is found within the PAZ domain, at the  
168 amino-terminal part of Piwi proteins [35,37]. The PIWI domain resides on the opposite side, at the  
169 carboxyl terminus. The PIWI domain belongs to the RNase H family of enzymes and the catalytic  
170 site is formed by three conserved amino acids (usually aspartate-aspartate-glutamate, DDE, or

171 aspartate-aspartate-histidine, DDH) [35,38]. Between the PAZ and PIWI domains there is the MID  
 172 domain. MID specifies strand- and nucleotide-biases of piRNAs, including their Uridine 5' bias  
 173 [39,40]. To evaluate the selective pressures acting along these genes, we analysed the  
 174 polymorphism pattern in *Ae. albopictus* samples from wild-collected populations and from the  
 175 Foshan reference strain. Synonymous and non-synonymous mutations were found for each gene in  
 176 all populations (Fig 2), with *Piwi1/3* displaying the lowest polymorphism (Table 1).

177

178 **Table 1. Polymorphism of *Aedes albopictus* *Piwi* genes in mosquitoes from the Foshan strain**  
 179 **and wild-caught mosquitoes from La Reunion (Reu) and Mexico (Mex).** We report the number  
 180 of sequences (*n*), as well as the number of sites (*L*), segregating sites (*S*), polymorphism measured  
 181 as  $\pi$  and  $\theta$ , and the Tajima's *D* statistic for both synonymous (*s*) and non-synonymous sites (*a*) for  
 182 each gene and population (and for the pooled sample).

183

|                       | <i>n</i> | <i>L</i> | <i>L<sub>s</sub></i> | <i>L<sub>a</sub></i> | <i>S<sub>s</sub></i> | <i>S<sub>a</sub></i> | $\pi_s$ | $\pi_a$ | $\theta_s$ | $\theta_a$ | $\pi_a/\pi_s$ | <i>D<sub>s</sub></i> | <i>D<sub>a</sub></i> |
|-----------------------|----------|----------|----------------------|----------------------|----------------------|----------------------|---------|---------|------------|------------|---------------|----------------------|----------------------|
| <b><i>Ago3</i></b>    |          |          |                      |                      |                      |                      |         |         |            |            |               |                      |                      |
| Pooled                | 112      | 2832     | 680.2                | 2151.8               | 316                  | 19                   | 0.0699  | 0.0005  | 0.0878     | 0.0017     | 0.007         | -0.68                | -1.95                |
| Foshan                | 32       | 2832     | 680.1                | 2151.9               | 124                  | 5                    | 0.0559  | 0.0004  | 0.0453     | 0.0006     | 0.007         | 0.89                 | -0.82                |
| Mex                   | 48       | 2832     | 680.2                | 2151.8               | 253                  | 14                   | 0.0780  | 0.0007  | 0.0838     | 0.0015     | 0.009         | -0.25                | -1.60                |
| Reu                   | 32       | 2658     | 643.8                | 2014.2               | 189                  | 4                    | 0.0678  | 0.0002  | 0.0729     | 0.0005     | 0.003         | -0.27                | -1.50                |
| <b><i>Piwi1-3</i></b> |          |          |                      |                      |                      |                      |         |         |            |            |               |                      |                      |
| Pooled                | 112      | 2658     | 644.3                | 2013.7               | 136                  | 23                   | 0.0319  | 0.0010  | 0.0399     | 0.0022     | 0.033         | -0.66                | -1.51                |
| Foshan                | 32       | 2658     | 644.0                | 2014.0               | 10                   | 2                    | 0.0047  | 0.0003  | 0.0039     | 0.0002     | 0.064         | 0.68                 | 0.44                 |
| Mex                   | 48       | 2658     | 644.9                | 2013.1               | 117                  | 21                   | 0.0463  | 0.0017  | 0.0409     | 0.0024     | 0.037         | 0.48                 | -0.89                |
| Reu                   | 32       | 2658     | 643.8                | 2014.2               | 52                   | 4                    | 0.0188  | 0.0004  | 0.0201     | 0.0005     | 0.021         | -0.23                | -0.48                |
| <b><i>Piwi2</i></b>   |          |          |                      |                      |                      |                      |         |         |            |            |               |                      |                      |
| Pooled                | 112      | 2625     | 644.0                | 1981.0               | 242                  | 28                   | 0.0760  | 0.0012  | 0.0710     | 0.0027     | 0.016         | 0.23                 | -1.65                |
| Foshan                | 32       | 2625     | 644.0                | 1981.0               | 115                  | 10                   | 0.0663  | 0.0017  | 0.0443     | 0.0013     | 0.026         | 1.88                 | 1.11                 |
| Mex                   | 48       | 2625     | 643.9                | 1981.1               | 184                  | 15                   | 0.0823  | 0.0010  | 0.0644     | 0.0017     | 0.012         | 1.01                 | -1.28                |
| Reu                   | 32       | 2625     | 644.1                | 1980.9               | 151                  | 6                    | 0.0712  | 0.0005  | 0.0582     | 0.0008     | 0.007         | 0.85                 | -0.94                |
| <b><i>Piwi4</i></b>   |          |          |                      |                      |                      |                      |         |         |            |            |               |                      |                      |
| Pooled                | 112      | 2592     | 620.0                | 1972.1               | 268                  | 61                   | 0.0729  | 0.0025  | 0.0817     | 0.0058     | 0.034         | -0.36                | -1.82                |
| Foshan                | 32       | 2592     | 620.1                | 1971.9               | 122                  | 18                   | 0.0610  | 0.0009  | 0.0489     | 0.0023     | 0.015         | 0.94                 | -2.05                |
| Mex                   | 48       | 2592     | 619.8                | 1972.2               | 181                  | 41                   | 0.0692  | 0.0035  | 0.0658     | 0.0047     | 0.051         | 0.19                 | -0.87                |
| Reu                   | 32       | 2592     | 620.1                | 1971.9               | 161                  | 45                   | 0.0699  | 0.0029  | 0.0645     | 0.0057     | 0.041         | 0.32                 | -1.79                |
| <b><i>Piwi5</i></b>   |          |          |                      |                      |                      |                      |         |         |            |            |               |                      |                      |
| Pooled                | 112      | 2745     | 653.1                | 2091.9               | 148                  | 23                   | 0.0457  | 0.0016  | 0.0428     | 0.0021     | 0.035         | 0.22                 | -0.66                |
| Foshan                | 32       | 2793     | 664.5                | 2128.5               | 58                   | 8                    | 0.0361  | 0.0018  | 0.0217     | 0.0009     | 0.050         | 2.47                 | 2.78                 |



|                     |     |      |       |        |     |    |        |        |        |        |       |       |       |
|---------------------|-----|------|-------|--------|-----|----|--------|--------|--------|--------|-------|-------|-------|
| Mex                 | 48  | 2745 | 652.9 | 2092.1 | 137 | 13 | 0.0470 | 0.0017 | 0.0473 | 0.0014 | 0.036 | -0.02 | 0.65  |
| Reu                 | 32  | 2793 | 663.4 | 2129.6 | 89  | 6  | 0.0326 | 0.0008 | 0.0333 | 0.0007 | 0.025 | -0.08 | 0.40  |
| <b><i>Piwi6</i></b> |     |      |       |        |     |    |        |        |        |        |       |       |       |
| Pooled              | 112 | 2661 | 649.0 | 2012.0 | 242 | 8  | 0.0805 | 0.0010 | 0.0705 | 0.0008 | 0.013 | 0.47  | 0.82  |
| Foshan              | 32  | 2661 | 648.3 | 2012.8 | 92  | 3  | 0.0632 | 0.0001 | 0.0352 | 0.0004 | 0.002 | 2.99  | -1.69 |
| Mex                 | 48  | 2661 | 649.9 | 2011.1 | 213 | 7  | 0.0840 | 0.0001 | 0.0739 | 0.0008 | 0.001 | 0.50  | -2.33 |
| Reu                 | 32  | 2661 | 648.5 | 2012.5 | 163 | 4  | 0.0784 | 0.0001 | 0.0624 | 0.0005 | 0.001 | 0.98  | -2.01 |
| <b><i>Piwi7</i></b> |     |      |       |        |     |    |        |        |        |        |       |       |       |
| Pooled              | 112 | 1977 | 469.8 | 1507.2 | 192 | 33 | 0.0877 | 0.0036 | 0.0772 | 0.0041 | 0.041 | 0.45  | -0.42 |
| Foshan              | 32  | 1977 | 469.8 | 1507.2 | 118 | 15 | 0.0905 | 0.0034 | 0.0624 | 0.0025 | 0.038 | 1.71  | 1.25  |
| Mex                 | 48  | 1977 | 469.9 | 1507.1 | 150 | 23 | 0.0905 | 0.0034 | 0.0719 | 0.0034 | 0.038 | 0.93  | -0.04 |
| Reu                 | 32  | 1977 | 469.6 | 1507.5 | 137 | 17 | 0.0803 | 0.0030 | 0.0724 | 0.0028 | 0.037 | 0.41  | 0.24  |

184

185

186

187

188

189

190

191

192

193

194

195

196

197

198

199

200

201

202

203

As expected, the laboratory strain Foshan showed the lowest levels of variability and Tajima's  $D$  values that contrast (in sign) from those of the other populations and from the pooled sample, consistent with a strong bottleneck associated to the strain establishment. In *Piwi4*, between 20 and 80 non-synonymous variants could be found inside and in proximity of the PAZ, MID and PIWI domains (S2 Fig.A), ten of these mutations were shared across all populations (S3 Table). The 5' region of *Piwi5* harboured several indels: two in-frame variants (i.e. 94\_99del; 113\_118del) were shared across all populations and were present in homozygosity in at least one sample (S2 Fig.B), suggesting that they are not detrimental. *Ago3* and *Piwi6* have very low non-synonymous nucleotide diversity, suggesting strong constraints at the protein level. However, the McDonald-Kreitman test [41] found signatures of adaptive evolution in *Piwi1/3* and also in *Piwi6*, consistent with divergent positive selection followed by purifying selection (Table 2.A). In contrast, *Piwi4* has a significant deficit of non-synonymous substitutions and/or excess of polymorphic non-synonymous segregating sites (Table 2.A). In this gene, Tajima's  $D$  is negative but in line with the values of the other *Piwi* genes, and the high non-synonymous polymorphism may reflect selection of intraspecific diversifying selection, as expected in genes involved in immunity. Because positive selection may have acted at the level of very few sites, this not contributing to the gene-level non-synonymous substitution pattern, we explicitly tested models of codon evolution. Signs of positive selection were found at different sites, including one site in the Linker2 and one site in the MID domain of *Piwi1/3*, two sites in the PAZ domain of *Piwi4*, two sites in the Flex domain of *Piwi5* and three sites, two in the Flex and

204 one in the Linker2 domains, of *Piwi6* (Table 2.B). Haplotype reconstruction of our samples showed  
 205 that these mutations can co-occur on the same gene, with the only exception of Y278D+H287P in  
 206 *Piwi4* and A67P+G86S in *Piwi6*.

207

208 **Table 2. Insights into Evolutionary divergence of Piwi genes in *Ae. albopictus*.** A)  
 209 McDonald-Kreitman test for each *Piwi* gene using the orthologous sequences of *Ae. aegypti*  
 210 as outgroup. NI = Neutrality Index; Alpha = proportion of base substitutions fixed by natural  
 211 selection; *P* estimated using Fisher's exact test. B) Output of Codeml with significant results

| A. McDonald-Kreitman test |             |                |              |              |              |              |              |
|---------------------------|-------------|----------------|--------------|--------------|--------------|--------------|--------------|
|                           | <i>Ago3</i> | <i>Piwi1/3</i> | <i>Piwi2</i> | <i>Piwi4</i> | <i>Piwi5</i> | <i>Piwi6</i> | <i>Piwi7</i> |
| <b>NI</b>                 | 0.582       | 0.516          | 0.9          | 3.888        | 0.696        | 0.154        | 0.745        |
| <b>alpha</b>              | 0.418       | 0.484          | 0.1          | -2.888       | 0.304        | 0.846        | 0.255        |
| <b><i>P</i></b>           | 0.114       | 0.008          | 0.785        | < 0.001      | 0.18         | < 0.001      | 0.272        |

212 regarding sites under positive selection.

213

| B. Codeml output for sites under positive selection |                       |                               |                |                     |
|-----------------------------------------------------|-----------------------|-------------------------------|----------------|---------------------|
| Gene                                                | Position <sup>1</sup> | Reference>Mutant <sup>2</sup> | P <sup>3</sup> | Domain <sup>4</sup> |
| <i>AGO3</i>                                         | -                     | -                             | -              |                     |
| <i>Piwi1-3</i>                                      | 485                   | K>R                           | 0.965*         | Linker2             |
|                                                     | 548                   | M>I                           | 0.984*         | MID                 |
| <i>Piwi2</i>                                        | -                     | -                             | -              |                     |
| <i>Piwi4</i>                                        | 278                   | Y>D                           | 0.993**        | PAZ                 |
|                                                     | 287                   | H>A,D,P,V                     | 1.000**        | PAZ                 |
| <i>Piwi5</i>                                        | 89-90                 | SA>PT                         | 1.000*         | Flex                |
|                                                     | 139                   | T>A                           | 1.000*         | Flex                |
| <i>Piwi6</i>                                        | 67                    | A>P                           | 0.992**        | Flex                |
|                                                     | 86                    | G>R,S                         | 0.957*         | Flex                |
| <i>Piwi7</i>                                        | 258                   | V>I                           | 0.999**        | Linker2             |
|                                                     | -                     | -                             | -              |                     |

214 <sup>1</sup> sites where signs of positive selection ( $\omega > 1$ ) were found; <sup>2</sup> reference amino acid and  
 215 alternative missense variant; <sup>3</sup>probability that  $\omega > 1$  under the Bayes empirical Bayes  
 216 (BEB) method (\* =  $P > 0.95$ ; \*\* =  $P > 0.99$ ); <sup>4</sup>protein domain based on computational

217 predictions of molecular structures. Domains are as follows: Linker2, linker region between  
218 PAZ and MID; PAZ domain; MID domain; and Flex, the Flexible stretch at the N-terminus.  
219

220 Finally, to gain insight on how variable *Piwi* genes are in comparison to slow- and fast-  
221 evolving genes of *Ae. albopictus*, we collected variability data of sets of genes previously identified  
222 to have slow and high evolutionary rates [42]. For each population, we compared the overall level of  
223 polymorphism (LoP) of the *Piwi* genes and of a dataset of fast-evolving genes (FGs) to that measured  
224 for a dataset of slow-evolving genes (SGs) (Pischedda et al., 2019). Our results indicate that *Piwi4*,  
225 *Piwi6* and *Piwi7* have LoP values comparable to those of FGs, while *Ago3* and *Piwi5* do not  
226 significantly deviate from the LoP values of SGs. *Piwi1/3* appears to be conserved (Fig 3).

## 227 **Computational predictions of molecular structures**

228 The functional significance of the mutations under selection, as well as that of all the shared  
229 missense mutations in the PAZ and PIWI domains, was tested by computing predictions of three-  
230 dimensional molecular structures of the *Piwi* proteins using the most-recent X-ray crystallography  
231 structure of Argonaute proteins as templates [43,44]. Homology modelling revealed high structural  
232 conservation among the seven *Piwi* proteins despite sequence heterogeneity (S2 Fig.; Fig 4.A).

233 Similarly, to *D. melanogaster*, the highest levels of amino acid sequence conservation were  
234 found in the regions that, based on homology modelling, define the inner pocket of Argonaute  
235 molecular assembly where the RNA binds. Significantly lower sequence conservation was found on  
236 the proteins surface (Fig 4.B). Based on our computational predictions, we could not detect  
237 aminoacidic polymorphisms that would affect RNA binding or processing, suggesting that all *Ae.*  
238 *albopictus* *Piwi* proteins may retain the Argonaute-like functions. Mapping of mutations under  
239 positive selection (Table 2.B) on the homology models showed that all variant amino acids were in  
240 regions distant from the predicted RNA-binding and/or processing sites, suggesting that these  
241 mutations are unlikely to alter protein folding, but could influence its stability.

## 242 **Developmental profile of *Ae. albopictus Piwi* genes**

243 To further gain insights on the functional specialization of *Piwi* genes, we assessed their  
244 expression profile throughout mosquito development, namely at 4-8 hours (h) after deposition to

245 capture the maternal-zygotic transition in expression, at late embryogenesis (i.e. 12-16 h and 16-24  
246 h post deposition), at two time points during larval development (i.e. 1<sup>st</sup> and 4<sup>th</sup> instar larvae) and at  
247 pupal and adult stages (for the latter only we sampled separately males and females). Adult females  
248 were dissected to extract ovaries from the carcasses both from females kept on a sugar diet and 48  
249 h after a blood meal, when a peak in *Piwi* gene expression was previously observed [45].

250 Expression levels of *Ago3*, *Piwi4*, *Piwi5*, *Piwi6* and *Piwi7* are at their peak in the embryonic  
251 stages, although at different time points (Fig 5). Overall, *AGO3*, *Piwi1/3*, *Piwi2* and *Piwi6* have a  
252 similar trend during development showing a second peak of expression in adult females and their  
253 ovaries, while the expression levels of *Piwi4*, *Piwi5* and *Piwi7* remain constant. In details, *Piwi7* is  
254 mostly expressed 4-8h after deposition, *Piwi5* and *Piwi6* are mostly expressed after 8-16h and *Ago3*  
255 and *Piwi4* have their pick of expression at 16-24h. On the contrary, *Piwi1/3* and *Piwi2* are mostly  
256 expressed in ovaries extracted from blood-fed and sugar-fed females, respectively (Fig 5.A, S4.A  
257 table). Interestingly, when considering the absolute expression levels, *Piwi7* is the least expressed  
258 of all the genes at any tested time point, with limited expression seen only in embryos within 24 hours  
259 post deposition (i.e. Ct values for *Piwi7* ranged from 24.04 to 30.65, at 4-8h and 1<sup>st</sup> instar larvae,  
260 respectively; at the same time points, Ct values for *AGO3* were 27.45 and 26.96.). These results are  
261 consistent with lack of expression from published RNA-seq data from adult mosquitoes.

262 Overall, at the adult stages, *Ago3* and all *Piwi* genes were more expressed in females than  
263 males. Expression in ovaries was higher than in the corresponding carcasses, in both sugar- and  
264 blood-fed females. Differences in carcasses vs. ovaries expression were more pronounced after  
265 blood-meal for *Ago3*, *Piwi1/3* and *Piwi6*, while expression of *Piwi2* was doubled in sugar-fed vs.  
266 blood-fed ovaries.

## 267 ***Piwi* genes expression following viral infection**

268 Finally, we assessed whether the expression pattern of *Piwi* genes was altered upon DENV  
269 and CHIKV infection (Fig 5.B). Clear differences in the expression pattern of *Piwi* genes was seen  
270 both when comparing data from CHIKV- versus DENV-infected samples, and carcasses versus  
271 ovaries. In ovaries, during CHIKV infection all *Piwi* genes were significantly up-regulated compared

272 to both sugar- and blood-fed mosquitoes. Four days post infection (dpi), the expression of *Ago3*,  
273 *Piwi1/3*, *Piwi6* and *Piwi7* was between 4 to 10 folds higher than that of *Piwi2*, *Piwi4* and *Piwi5*, which  
274 nevertheless were upregulated with respect to ovaries of sugar- and blood-fed mosquitoes. An  
275 opposite profile was seen in the carcasses, where all *Piwi* genes, particularly *Piwi1/3* and *Piwi4*,  
276 were down-regulated. At 4 dpi, CHIKV has already disseminated throughout the mosquito body, has  
277 reached the salivary glands and is able to be transmitted. CHIKV viral titer was reduced ten folds by  
278 14 dpi and the profile of *Piwi* genes changed. Expression in the ovaries decreased between 3 (*Piwi5*)  
279 to 20 (*Piwi7*) times with respect to values observed at 4 dpi, but remained higher than the  
280 corresponding expression values in ovaries of both sugar and blood-fed mosquitoes. In carcasses  
281 all *Piwi* genes inverted their expression pattern during the infection phase, increasing up to more  
282 than 100 times in the case of *Piwi4*, *Piwi5* and *Piwi6*. At 14 dpi, expression of the *Piwi* genes was  
283 highest in CHIKV infected carcasses than in carcasses of sugar- and blood-fed mosquitoes.

284 For DENV, infection progresses differently than CHIKV. At 4 dpi there is no virus in the  
285 salivary gland, where the viral titer was measured at zero. By 21 dpi, DENV has established  
286 persistent infection [46]. At 4 dpi expression of *Piwi* genes was lower in DENV- and blood-fed ovaries  
287 than in ovaries of sugar-fed mosquitoes. The only exception was *Piwi6*, which was slightly up-  
288 regulated in ovaries of DENV-infected samples, but slightly down-regulated in ovaries of blood-fed  
289 mosquitoes. On the contrary, at the same time point, carcasses of DENV-infected samples showed  
290 a drastic increase in the expression of all *Piwi* genes with respect to blood-fed samples; this increase  
291 was between 7 to 87 times for *Piwi7* and *Piwi2*, respectively. By 21 dpi, expression in the ovaries  
292 increased for all *Piwi* genes, in comparison to what observed both at 4dpi and in blood-fed ovaries,  
293 suggesting the increase in expression of *Piwi* genes is related to DENV dissemination. Interestingly,  
294 if we compare levels of expression in CHIKV-infected ovaries at 4 dpi and DENV-infected samples  
295 at 21 dpi, corresponding to the time at which both viral species have disseminated throughout the  
296 mosquito body, we observe similar levels of fold-change expression of *Piwi4* and *Piwi7*, while *Ago3*,  
297 *Piwi1/3* and *Piwi6* show higher fold-change in CHIKV compared to DENV samples. Whether this  
298 trend is dependent on the viral species or viral titer requires further investigation. The same type of  
299 comparison in carcasses shows a higher fold-change expression level of all *Piwi* genes, particularly

300 *Piwi1/3* and *Piwi5*, in DENV- versus CHIKV-infected samples, even if viral titer are lower for DENV  
301 (S4.B Table). Overall these results support the hypothesis of a concerted activity of all PIWI proteins  
302 during viral dissemination for DENV, and maintenance of infection rely on expression of primarily  
303 *Piwi5*. On the contrary, establishment of persistent CHIKV infection was accompanied by elicitation  
304 of all *Piwi* gene expression, particularly *Piwi4* and, again, *Piwi5*.

305

## Discussion

306 Recent experimental evidences extend the function of the piRNA pathway to antiviral  
307 immunity in *Aedes spp.* mosquitoes [12,15]. The broader roles of the piRNA pathway in *Aedes spp.*  
308 mosquitoes, compared to what is known in *D. melanogaster*, has been linked to the expansion and  
309 functional specialization of its core components [12,47,48]. Besides *Ago3*, the genome of *Ae. aegypti*  
310 harbours six *Piwi* genes (i.e. *Piwi1/3*, *Piwi2*, *Piwi4*, *Piwi5*, *Piwi6*, *Piwi7*), some of which show tissue  
311 and development-specific expression profile and have been preferentially associated with either TE-  
312 derived or viral piRNAs [16,20,21]. These studies were based on the knowledge of the gene structure  
313 of each *Ae. aegypti Piwi* gene and the application of *ad hoc* RNAi-based silencing experiments and  
314 *in vitro* expression assays, but lacked an evolutionary perspective [18–21].

315 In this work we focused on the emerging arboviral vector *Ae. albopictus* and we show how  
316 the application of evolutionary and protein modelling techniques helps to unravel functional  
317 specialization of Piwi proteins. The genome of *Ae. albopictus* harbors one copy of *Ago3* and six *Piwi*  
318 genes (i.e. *Piwi1/3*, *Piwi2*, *Piwi4*, *Piwi5*, *Piwi6* and *Piwi7*), each a one-to-one orthologue to the *Ae.*  
319 *aegypti Piwi* genes. The only exceptions are *Piwi2* and *Piwi1/3*, where the two genes from the same  
320 species cluster together. In *Ae. aegypti*, these two genes both map on Chromosome 1, separated  
321 by ~ 20kb, suggesting they may undergo frequent gene conversion.

322 All transcripts retain the PAZ and PIWI domains, which are the hallmarks of the Argonaute  
323 protein family [35]. By using homology modelling, we obtained predictions of molecular architectures  
324 for *Ae. albopictus Ago3* and *Piwi* proteins, onto which we mapped the putative boundaries of each  
325 domain. Superpositions and sequence comparisons allowed clear identification of the catalytic DDH

326 triad within the PIWI domain of all modelled proteins. This conservation is consistent with strong  
327 sequence matching in the putative RNA binding regions of the PIWI, PAZ and MID domains and  
328 suggests the possible maintenance of slicer activity, albeit experimental validation of each isoform  
329 is necessary.

330 The expression of all *Piwi* genes was confirmed throughout the developmental stages and  
331 the adult life of the mosquito, both in ovaries and somatic tissues. Interestingly, *Piwi7* transcript  
332 expression starkly drops following early embryogenesis, to the point that we could detect it neither  
333 in RNA-seq analyses, nor in Northern-blot experiments (data not shown).

334 The expression of *Piwi* genes was elicited upon arboviral infection, indirectly confirming the  
335 antiviral role of the piRNA pathway. The expression profile of *Piwi* genes showed differences  
336 depending on both the species of infecting virus and on when the expression was measured. In  
337 CHIKV-infected samples, expression of *Piwi* genes was mostly elicited in ovaries or carcasses at 4  
338 or 21 dpi, respectively. On the contrary, in DENV-infected samples, the highest expression of *Piwi*  
339 genes was seen in carcasses 4 dpi. These results are concordant with the timing in piRNAs  
340 accumulation following CHIKV or DENV infection. In *Ae. albopictus* mosquitoes infected with CHIKV,  
341 secondary piRNAs are not found 3 dpi, but are enriched 9 dpi [9]. In contrast, in *Ae. aegypti*  
342 mosquitoes infected with DENV2, piRNAs are the dominant small RNA populations 2 dpi [48].  
343 Overall, these observations and our expression analyses support the hypothesis of an early  
344 activation of the piRNA pathway following DENV infection, but a late activation after CHIKV infection.  
345 Additionally, our expression analysis is consistent with a generalist antiviral role for Piwi5, which is  
346 elicited both during DENV and CHIKV infection [20], but suggest a more prominent role for Piwi6  
347 and Piwi1/3 or Piwi4 and Ago3 during infection with DENV and CHIKV, respectively.

## 348 **Materials and methods**

### 349 **Mosquitoes**

350 *Aedes albopictus* mosquitoes of the Foshan strain were used in this study [10]. Mosquitoes  
351 were reared under constant conditions, at 28 °C and 70-80% relative humidity with a 12/12 h

352 light/dark cycle. Larvae were reared in plastic containers at a controlled density to avoid competition  
353 for food. Food was provided daily in the form of fish food (Tetra Goldfish Gold Colour). Adults were  
354 kept in 30 cm<sup>3</sup> cages and fed with cotton soaked in 0.2 g/ml sucrose as a carbohydrate source. Adult  
355 females were fed with defibrinated mutton blood (Biolife Italiana) using a Hemotek blood feeding  
356 apparatus. Mosquitoes from Mexico and La Reunion island were collected in 2017 as adults and  
357 maintained in ethanol 70% before shipment to Italy. All samples were processed at the University of  
358 Pavia.

### 359 **Mosquito infections**

360 Foshan mosquitoes were infected with either DENV serotype 1, genotype 1806 or with  
361 CHIKV 06.21. DENV-1 (1806) was isolated from an autochthonous case from Nice, France in 2010  
362 [49]. CHIKV 06-21 was isolated from a patient on La Reunion Island in 2005 [50]. Both strains were  
363 kindly provided by the French National Reference Center for Arboviruses at the Institut Pasteur.  
364 CHIKV 06-21 and DENV-1 1806 were passaged twice on cells to constitute the viral stocks for  
365 experimental infections of mosquitoes, on C6/36 cells for CHIKV 06-21 and on African green monkey  
366 kidney Vero cells for DENV-1 1806. Viral titers of stocks were estimated by serial dilutions and  
367 expressed in focus-forming units (FFU)/mL.

368 Four boxes containing 60 one-week-old females were exposed to an infectious blood-meal  
369 composed by 2 mL of washed rabbit red blood cells, 1 mL of viral suspension and 5 mM of ATP. The  
370 titer of the blood-meal was 10<sup>7</sup> PFU/mL for CHIKV and 10<sup>6.8</sup> PFU/mL for DENV. Fully engorged  
371 females were placed in cardboard boxes and fed with a 10% sucrose solution. Mosquitoes were  
372 incubated at 28 °C until analysis.

373 In parallel, mosquitoes were fed with uninfected blood-meal or kept on a sugar-diet and grown  
374 in the same conditions. Thirty mosquitoes were killed to be analyzed at days 4 and 14 post-infection  
375 (pi) for CHIKV, and at days 4 and 21 dpi for DENV.

376 To estimate transmission, saliva was collected from individual mosquitoes as described in  
377 [51]. After removing wings and legs from each mosquito, the proboscis was inserted into a 20 µL tip  
378 containing 5 µL of Fetal Bovine Serum (FBS) (Gibco, MA, USA). After 30 min, FBS containing saliva



379 was expelled in 45  $\mu$ L of Leibovitz L15 medium (Invitrogen, CA, USA) for titration. Transmission  
380 efficiency refers to the proportion of mosquitoes with infectious saliva among tested mosquitoes  
381 (which correspond to engorged mosquitoes at day 0 pi having survived until the day of examination).  
382 The number of infectious particles in saliva was estimated by focus fluorescent assay on C6/36 *Ae.*  
383 *albopictus* cells. Samples were serially diluted and inoculated into C6/36 cells in 96-well plates. After  
384 incubation at 28°C for 3 days (CHIKV) or 5 days (DENV), plates were stained using hyperimmune  
385 ascetic fluid specific to CHIKV or DENV-1 as primary antibody. A Fluorescein-conjugated goat anti-  
386 mouse was used as the second antibody (Biorad). Viral titers were  $16,266 \pm 50,446$  FFU and  $155 \pm 125$   
387 FFU for CHIKV at 14 dpi and DENV at 21 dpi, respectively.

388 At the same time points mosquitoes that had been fed a not-infectious blood or kept on a  
389 sugar diet were sampled and dissected as above.

### 390 **Bioinformatic identification of *Piwi* genes in the *Ae. albopictus* genome**

391 The sequences of the *Ae. aegypti* *Piwi* genes [52] were used as query to find orthologs in the  
392 reference genome of the *Ae. albopictus* Foshan strain (AaloF1 assembly) and in the genome of the  
393 *Ae. albopictus* C6/36 cell line (canu\_80X\_arrow2.2 assembly) using the BLAST tool in Vectorbase  
394 (www.vectorbase.org). Inferred coding sequences (CDS) were analysed in Prosite  
395 (Prosite.expasy.org/prosite.html) to screen for the typical PAZ and PIWI domains of Argonaute  
396 proteins [53].

### 397 **Copy number of *piwi* genes**

398 qPCR reactions were performed using the QuantiNova SYBR Green PCR Kit (Qiagen)  
399 following the manufacturer's instructions on an Eppendorf Mastercycler RealPlex4, on genomic DNA  
400 from four mosquitoes and using gene-specific primers, after having verified their efficiency  
401 (S5Table). DNA was extracted using DNA Isolation DNeasy Blood & Tissue Kit (Qiagen). Estimates  
402 of gene copy number were performed based on the  $2^{-\Delta CT}$  method using *Piwi6* and the para sodium  
403 channel genes (AALF000723) as references [54].

## 404 **Structure of *Piwi* genes**

405 DNA extracted from whole mosquitoes and dissected ovaries [55] was used as template in  
406 PCR amplifications to confirm the presence and the genome structure of each bioinformatically-  
407 identified *Piwi* gene. Primers were designed to amplify each exon, with particular attention to detect  
408 differences between paralogous *Piwi* genes (S1 Table). The DreamTaq Green PCR Master Mix  
409 (Thermo Scientific) was used for PCR reactions with the following parameter: 94 °C for 3 minutes,  
410 40 cycles at 94 °C for 30 sec, 55 °C-62 °C for 40 sec, 72 °C for 1-2 minutes and final extension step  
411 of 72 °C for 10 minutes. PCR products were visualized under UV light after gel electrophoresis using  
412 1-1.5% agarose gels stained with ethidium bromide and a 100 bp or 1 kb molecular marker. PCR  
413 products were either directly sequenced or cloned using the TOPO® TA Cloning® Kit strategy  
414 (Invitrogen) following the manufacturer's instructions. DNA plasmids were purified using the QIAprep  
415 Spin Miniprep Kit and sequenced.

## 416 ***Piwi* gene transcript sequences and phylogeny**

417 RNA was extracted using a standard TRIzol protocol from pools of 5 adult female mosquitoes  
418 to verify the transcript sequence of each *Piwi* gene. Sets of primers were designed for each gene to  
419 amplify its entire transcript sequence (S5 Table). PCR reactions were performed using a High Fidelity  
420 taq-polymerase (Platinum SuperFi DNA Polymerase, Invitrogen) following manufacturer's  
421 instructions. PCR products were cloned using the TOPO® TA Cloning® Kit (Invitrogen) and plasmid  
422 DNA, purified using the QIAprep Spin Miniprep Kit, was sequenced. Rapid amplification of cDNA  
423 ends (RACE) PCRs were performed using FirstChoice RLM-RACE Kit (Thermo Fisher Scientific) to  
424 analyse 5' and 3' ends of the transcript sequences following manufacturer's instructions.  
425 Amplification products were cloned and sequenced as previously indicated.

426 Sequences of the identified *Ae. albopictus Piwi* gene transcripts were aligned to sequences  
427 of *Culicidae* and *D. melanogaster Piwi* transcripts, as downloaded from VectorBase  
428 ([www.vectorbase.org](http://www.vectorbase.org)), using MUSCLE [56]. Maximum-likelihood based phylogenetic inference was  
429 based on RAxML after 1000 bootstrap resampling of the original dataset and was done through the

430 CIPRESS portal (<http://www.phylo.org/index.php/>). Resulting tree was visualised using FigTree  
431 (<http://tree.bio.ed.ac.uk/software/figtree/>).

## 432 **Northern Blot analysis**

433 10µg of total RNA from a pool of 10 sugar-fed females was run in a 1% x 2%  
434 agarose/formaldehyde gel (1 g agarose, 10 ml 10x MOPS buffer, 5.4 ml 37% formaldehyde, 84.6 ml  
435 DEPC water). Gels were washed twice in 20x SSC for 15 minutes prior to blotting. RNA was  
436 transferred to an Amersham Hybond-N+ nylon membrane (GE healthcare) using 20x SSC and  
437 cross-linked using UV light exposure for 1 minute. Probes were labelled with biotin using Biotin-High  
438 Prime (Roche). Hybridization and detection of biotinylated probes was performed using the  
439 North2South™ Chemiluminescent Hybridization and Detection Kit (Thermo Fisher Scientific)  
440 following manufacturer instructions.

## 441 **Polymorphisms of *Piwi* genes**

442 We investigated *Piwi* gene polymorphism by looking at the distribution of single nucleotide  
443 polymorphism in whole genome sequence data from total of 56 mosquitoes, of which 24 from  
444 Mexico, 16 from the island of La Reunion island and 16 from the reference Foshan strain. Whole  
445 genome sequencing libraries were generated and sequenced on the Illumina HiSeqX platform at the  
446 Genomics Laboratory of Verily in South San Francisco, California to generate 150 basepair paired-  
447 end reads.

448 Illumina reads were mapped to *Piwi* gene transcript sequences using Burrows-Wheeler  
449 Aligner (BWA-MEM) [57] with custom parameters. Polymorphisms was tested by FreeBayes [58].  
450 Annotation of the detected mutations, as well counts of synonymous and non-synonymous variants,  
451 were performed in snpEff [59]. Frameshifts and non-synonymous variants were plotted using muts-  
452 needle-plot [60]. Venn diagrams of positions with mutations in the three tested samples were built  
453 using Venny 2.1 [61]. Haplotype reconstruction was performed using seqPHASE [62] and PHASE  
454 [63,64]. The inferred haplotypes were analysed with DnaSP [65], which estimated the number of  
455 segregating sites and the level of nucleotide diversity  $\pi$  [66] in both synonymous and non-  
456 synonymous sites. Based on the number of segregating sites and sample size, we also manually

457 computed the nucleotide diversity estimator  $\theta$  [67] and Tajima's  $D$  statistic [68]. We also tested for  
458 signatures of adaptive evolution using the McDonald-Kreitman test [41], which compares the rate of  
459 polymorphism and substitutions in synonymous and non-synonymous sites. For this analysis we  
460 used alignments that included the orthologous sequences from *Ae. aegypti*.

461 Consensus sequences for each gene from each individual were also aligned in TranslatorX  
462 [69] using Clustalw [70] and used for Maximum-likelihood based phylogenetic inference based on  
463 RAxML after 1000 bootstrap under the GTRGAMMA model. Signs of selective pressure between  
464 populations [71] were investigated with Codeml in PAML v. 4.9 [72], as implemented in PAMLX [73].  
465 In particular, we compared the M1a (nearly-neutral) model to the M2a (positive selection) model by  
466 inferring  $\omega$  estimations and posterior probabilities under the Bayes empirical Bayes (BEB) approach  
467 [72].

468 The overall level of polymorphism (LoP) for slow-evolving genes (SGs) (AALF008224,  
469 AALF005886, AALF020750, AALF026109, AALF014156, AALF018476, AALF014287,  
470 AALF004102, AALF003606, AALF019476, AALF028431, AALF018378, AALF027761,  
471 AALF014448), fast-evolving genes (FGs) (AALF010748, AALF022019, AALF024551, AALF017064,  
472 AALF004733, AALF018679, AALF028390, AALF026991, AALF014993, AALF009493,  
473 AALF010877, AALF012271, AALF009839, AALF019413) and the *Piwi* genes was calculated for  
474 each population following the pipeline as in [42]. Briefly, SNPs and INDELS were inferred using four  
475 Variant callers (i.e. Freebayes [58], Platypus [74], Vardict [75] and GATK UnifiedGenotyper [76]) and  
476 the data merged and filtered with custom scripts. The LoP for each individual was calculated as the  
477 number of variants averaged over the region length, and the median value for each population was  
478 used for subsequent analyses. Statistical analyses were performed in R studio [77]. Fold-change  
479 differences were computed as the ratio of the median LoP for each *Piwi* gene and each FG gene  
480 over the median LoP of the SG genes. Statistical differences in LoP distribution was assessed via  
481 the Kolmogorov-Smirnov test and the p-value threshold was adjusted with the Bonferroni correction.

## 482 **Homology modelling**

483 Computational structural investigations were carried out initially through the identification of  
484 the closest homologs based on sequence identity (using *NCBI Blast* [78]) and secondary structure  
485 matching (using *HHPRED* [79]). Homology model were then generated *MODELLER* [80] using on  
486 the structures *Kluyveromyces polysporus* Argonaute with a guide RNA (PDB ID 4F1N), Human  
487 Argonaute2 Bound to t1-G Target RNA (PDB ID 4z4d) [81], *T. thermophilus* Argonaute complexed  
488 with DNA guide strand and 19-nt RNA target strand (PDB ID 3HM9), and silkworm PIWI-clade  
489 Argonaute Siwi bound to piRNA (PDB ID 5GUH).

490 Computational models were manually adjusted through the removal of non-predictable N-  
491 and C-terminal flexible regions using *COOT* [82] followed by geometry idealization in *PHENIX* [83]  
492 to adjust the overall geometry. Final model quality was assessed by evaluating average bond  
493 lengths, bond angles, clashes, and Ramachandran statistics using Molprobitry [84] and the *QMEAN*  
494 server [85] Structural figures were generated with *PyMol* [86].

## 495 **Developmental expression profile of *Piwi* genes**

496 Publicly available RNA-seq data (runs: SRR458468, SRR458471, SRR1663685,  
497 SRR1663700, SRR1663754, SRR1663913, SRR1812887, SRR1812889, SRR1845684) were  
498 downloaded and aligned using Burrows-Wheeler Aligner (BWA-MEM) [57] to the current *Ae.*  
499 *albopictus* genome assembly (AaloF1). Aligned reads were visualized in Integrative Genomics  
500 Viewer (IGV) [87]. Total RNA was extracted from embryos, 1<sup>st</sup> and 4<sup>th</sup> instar larvae, pupae, and adults  
501 using Trizol (Thermo Fisher Scientific). Embryos consisted of two pools of 60 eggs at different time  
502 points after oviposition (i.e. 4-8 h, 8-16 h and 16-24 h). Adult samples consisted of males and females  
503 kept on a sugar-diet; females fed an uninfected blood-meal; and females fed a DENV- or CHIK-  
504 infected blood. All blood-fed females were dissected to separate ovaries from the carcasses.  
505 Females fed an uninfected blood-meal were sampled 48 h after blood-meal. These parameters were  
506 based on the results of previous studies on *Anopheles stephensi* and *Ae. aegypti* that showed high  
507 *Piwi* gene expression during early embryogenesis or 48-72 h post blood meal [45]. For each stage,

508 RNA was extracted from pools of 10-15 mosquitoes, except for first instar larvae and embryos when  
509 20 or 60 individuals were used, respectively.

510 RNA was DNaseI-treated (Sigma-Aldrich) and reverse-transcribed in a 20 µl reaction using  
511 the qScript cDNA SuperMix (Quantabio) following the manufacturer's instructions. Quantitative RT-  
512 PCRs (qRT-PCR) were performed as previously described using two biological replicates per  
513 condition and the RPL34 gene as housekeeping [88]. Relative quantification of *Piwi* genes was  
514 determined using the software qBase+ (Biogazelle). Expression values were normalized with respect  
515 to those obtained from 4-8h embryos for the analysis of the developmental stages, and to sugar-fed  
516 females for the infection analyses.

### 517 **Expression analyses following infection**

518 Fold-change expression values for each *Piwi* gene was assessed for non-infectious-blood-fed  
519 controls, CHIKV-infected and DENV-infected samples after normalization on sugar-fed controls.  
520 qRT-PCR experiments (Supplementary table 4) were set up for two replicate pools of 15 ovaries and  
521 15 carcasses at days 4, 14 and 4, 21 for CHIKV and DENV, respectively and the corresponding  
522 sugar and non-infectious-blood controls. RNA extraction, qRT-PCR and data analyses were  
523 performed as described in the previous paragraph (see "Developmental expression profile of *Piwi*  
524 genes"). Fold-change differences significance was assessed using the Analysis of Variance  
525 (ANOVA) procedure [89,90] as implemented in qBASE+.

526

### 527 **Funding**

528 This research was funded by a European Research Council Consolidator Grant (ERC-CoG)  
529 under the European Union's Horizon 2020 Programme (Grant Number ERC-CoG 682394) to M.B.;  
530 by the Italian Ministry of Education, University and Research FARE-MIUR project R1623HZA5 to  
531 M.B.; by the Italian Ministry of Education, University and Research (MIUR): Dipartimenti Eccellenza  
532 Program (2018–2022) Dept. of Biology and Biotechnology "L. Spallanzani", University of Pavia.

533

534 The funders had no role in study design, data collection and interpretation, or the decision to  
535 submit the work for publication.

536

537

### **Authors' contributions**

538 MM performed all experiments, analyzed the data and wrote the manuscript; LH performed PCR and  
539 qRT-PCR analyses and analyzed the data; GI contributed in identifying *Ae. albopictus Piwi* genes  
540 and their transcript sequences; VH contributed in infection experiments and analyzed the data; FV  
541 contributed in characterizing *Piwi* gene transcripts and their expression; UP, LO and EP contributed  
542 in bioinformatic analyses for *Piwi* gene polymorphism; AF supervised infection experiments analyzed  
543 data and wrote the manuscript; JC performed WGS of wild-caught mosquitoes and revised the  
544 manuscript; FF performed computational homology modelling and structural analyses, and revised  
545 the manuscript; RCL contributed in collecting wild mosquitoes and analyzed the data; MB conceived  
546 the study, analyzed the data and wrote the manuscript. All authors read and approved the final  
547 manuscript.

548

549

### **Acknowledgments**

550 We thank Monica Ruth Waghacore for insectary work.

551

## References

- 552 1. Bohmert K, Camus I, Bellini C, Bouchez D, Caboche M, Banning C. AGO1 defines a novel  
553 locus of Arabidopsis controlling leaf development. *EMBO J.* 1998;  
554 doi:10.1093/emboj/17.1.170
- 555 2. Swarts DC, Makarova K, Wang Y, Nakanishi K, Ketting RF, Koonin E V., et al. The  
556 evolutionary journey of Argonaute proteins. *Nature Structural and Molecular Biology.* 2014.  
557 doi:10.1038/nsmb.2879
- 558 3. Lewis SH, Salmela H, Obbard DJ. Duplication and diversification of dipteran argonaute  
559 genes, and the evolutionary divergence of Piwi and Aubergine. *Genome Biol Evol.* 2016;8:  
560 507–518. doi:10.1093/gbe/evw018
- 561 4. Buck AH, Blaxter M. Functional diversification of Argonautes in nematodes: an expanding  
562 universe: Figure 1. *Biochem Soc Trans.* 2013; doi:10.1042/BST20130086
- 563 5. Bollmann SR, Press CM, Tyler BM, Grünwald NJ. Expansion and divergence of argonaute  
564 genes in the oomycete genus *phytophthora*. *Front Microbiol.* 2018;  
565 doi:10.3389/fmicb.2018.02841
- 566 6. Singh RK, Gase K, Baldwin IT, Pandey SP. Molecular evolution and diversification of the  
567 Argonaute family of proteins in plants. *BMC Plant Biol.* 2015; doi:10.1186/s12870-014-0364-  
568 6
- 569 7. Bronkhorst AW, Van Rij RP. The long and short of antiviral defense: Small RNA-based  
570 immunity in insects. *Current Opinion in Virology.* 2014. doi:10.1016/j.coviro.2014.03.010
- 571 8. Poirier EZ, Goic B, Tomé-Poderti L, Frangeul L, Boussier J, Gausson V, et al. Dicer-2-  
572 Dependent Generation of Viral DNA from Defective Genomes of RNA Viruses Modulates  
573 Antiviral Immunity in Insects. *Cell Host Microbe.* 2018; doi:10.1016/j.chom.2018.02.001
- 574 9. Goic B, Stapleford KA, Frangeul L, Doucet AJ, Gausson V, Blanc H, et al. Virus-derived  
575 DNA drives mosquito vector tolerance to arboviral infection. *Nat Commun.* 2016;  
576 doi:10.1038/ncomms12410
- 577 10. Palatini U, Miesen P, Carballar-Lejarazu R, Ometto L, Rizzo E, Tu Z, et al. Comparative  
578 genomics shows that viral integrations are abundant and express piRNAs in the arboviral  
579 vectors *Aedes aegypti* and *Aedes albopictus*. *BMC Genomics.* 2017; doi:10.1186/s12864-  
580 017-3903-3
- 581 11. Whitfield ZJ, Dolan PT, Kunitomi M, Tassetto M, Seetin MG, Oh S, et al. The Diversity,  
582 Structure, and Function of Heritable Adaptive Immunity Sequences in the *Aedes aegypti*  
583 Genome. *Curr Biol.* 2017; doi:10.1016/j.cub.2017.09.067
- 584 12. Miesen P, Joosten J, van Rij RP. PIWIs Go Viral: Arbovirus-Derived piRNAs in Vector  
585 Mosquitoes. *PLoS Pathog.* 2016;12: 1–17. doi:10.1371/journal.ppat.1006017
- 586 13. Olson KE, Bonizzoni M. Nonretroviral integrated RNA viruses in arthropod vectors: an



- 587 occasional event or something more? *Curr Opin Insect Sci.* Elsevier Inc; 2017;22: 45–53.  
588 doi:10.1016/j.cois.2017.05.010
- 589 14. Brennecke J, Aravin AA, Stark A, Dus M, Kellis M, Sachidanandam R, et al. Discrete Small  
590 RNA-Generating Loci as Master Regulators of Transposon Activity in *Drosophila*. *Cell.*  
591 2007;128: 1089–1103. doi:10.1016/j.cell.2007.01.043
- 592 15. Petit M, Mongelli V, Frangeul L, Blanc H, Jiggins F, Saleh M-C. piRNA pathway is not  
593 required for antiviral defense in *Drosophila melanogaster*. *Proc Natl Acad Sci.* 2016;  
594 doi:10.1073/pnas.1607952113
- 595 16. Akbari OS, Antoshechkin I, Amrhein H, Williams B, Diloreto R, Sandler J, et al. The  
596 Developmental Transcriptome of the Mosquito *Aedes aegypti*, an Invasive Species and  
597 Major Arbovirus Vector. *G3&#58; Genes|Genomes|Genetics.* 2013;  
598 doi:10.1534/g3.113.006742
- 599 17. Matthews BJ, Dudchenko O, Kingan SB, Koren S, Antoshechkin I, Crawford JE, et al.  
600 Improved reference genome of *Aedes aegypti* informs arbovirus vector control. *Nature.*  
601 2018; doi:10.1038/s41586-018-0692-z
- 602 18. Miesen P, Ivens A, Buck AH, van Rij RP. Small RNA Profiling in Dengue Virus 2-Infected  
603 *Aedes* Mosquito Cells Reveals Viral piRNAs and Novel Host miRNAs. *PLoS Negl Trop Dis.*  
604 2016; doi:10.1371/journal.pntd.0004452
- 605 19. Girardi E, Miesen P, Pennings B, Frangeul L, Saleh MC, Van Rij RP. Histone-derived piRNA  
606 biogenesis depends on the ping-pong partners Piwi5 and Ago3 in *Aedes aegypti*. *Nucleic*  
607 *Acids Res.* 2017; doi:10.1093/nar/gkw1368
- 608 20. Miesen P, Girardi E, Van Rij RP. Distinct sets of PIWI proteins produce arbovirus and  
609 transposon-derived piRNAs in *Aedes aegypti* mosquito cells. *Nucleic Acids Res.* 2015;43:  
610 6545–6556. doi:10.1093/nar/gkv590
- 611 21. Varjak M, Kean J, Vazeille M, Failloux A, Kohl A. *Aedes aegypti* Piwi4 Is a Noncanonical.  
612 *mSphere.* 2017;2: e00144-17.
- 613 22. Varjak M, Leggewie M, Schnettler E. The antiviral piRNA response in mosquitoes? 2018; 1–  
614 12. doi:10.1099/jgv.0.001157
- 615 23. Schnettler E, Donald CL, Human S, Watson M, Siu RWC, McFarlane M, et al. Knockdown of  
616 piRNA pathway proteins results in enhanced semliki forest virus production in mosquito  
617 cells. *J Gen Virol.* 2013;94: 1680–1689. doi:10.1099/vir.0.053850-0
- 618 24. Hahn MW. Distinguishing among evolutionary models for the maintenance of gene  
619 duplicates. *Journal of Heredity.* 2009. doi:10.1093/jhered/esp047
- 620 25. Obbard DJ, Jiggins FM, Halligan DL, Little TJ. Natural selection drives extremely rapid  
621 evolution in antiviral RNAi genes. *Curr Biol.* 2006;16: 580–585.  
622 doi:10.1016/j.cub.2006.01.065
- 623 26. Bonizzoni M, Gasperi G, Chen X, James AA. The invasive mosquito species *Aedes*

- 624 albopictus: Current knowledge and future perspectives. *Trends in Parasitology*. 2013.  
625 doi:10.1016/j.pt.2013.07.003
- 626 27. Rezza G. Dengue and chikungunya: long-distance spread and outbreaks in naïve areas.  
627 *Pathog Glob Health*. 2014; doi:10.1179/2047773214Y.0000000163
- 628 28. Bonilauri P, Bellini R, Calzolari M, Angelini R, Venturi L, Fallacara F, et al. Chikungunya  
629 virus in *Aedes albopictus*, Italy. *Emerging Infectious Diseases*. 2008.  
630 doi:10.3201/eid1405.071144
- 631 29. Venturi G, Di Luca M, Fortuna C, Elena Remoli M, Riccardo F, Severini F, et al. Detection of  
632 a chikungunya outbreak in Central Italy Detection of a chikungunya outbreak in Central.  
633 *Euro Surveill*. 2017;22: 1–4. doi:10.2807/1560
- 634 30. Gjenero-Margan I, Aleraj B, Krajcar D, Lesnikar V, Klobučar A, Pem-Novosel I, et al.  
635 Autochthonous dengue fever in Croatia, August- September 2010. *Eurosurveillance*.  
636 2011;16: 1–4. doi:19805 [pii]
- 637 31. Marchand E, Prat C, Jeannin C, Lafont E, Bergmann T, Flusin O, et al. Autochthonous case  
638 of dengue in France, October 2013. *Eurosurveillance*. 2013; doi:10.2807/1560-  
639 7917.ES2013.18.50.20661
- 640 32. Delisle E, Rousseau C, Broche B, Leparc-Goffart I, L'Ambert G, Cochet A, et al.  
641 Chikungunya outbreak in Montpellier, France, September to October 2014. *Euro Surveill*.  
642 2015; doi:10.2807/1560-7917.ES2015.20.17.21108
- 643 33. Calba C, Guerbois-Galla M, Franke F, Jeannin C, Auzet-Caillaud M, Grard G, et al.  
644 Preliminary report of an autochthonous chikungunya outbreak in France, July to September  
645 2017. *Eurosurveillance*. 2017; doi:10.2807/1560-7917.ES.2017.22.39.17-00647
- 646 34. Bouri N, Sell TK, Franco C, Adalja AA, Henderson DA, Hynes NA. Return of epidemic  
647 dengue in the United States: Implications for the public health practitioner. *Public Health*  
648 *Rep*. 2012; doi:10.1177/003335491212700305
- 649 35. Joshua-Tor L. The argonautes. *Cold Spring Harbor Symposia on Quantitative Biology*. 2006.  
650 doi:10.1101/sqb.2006.71.048
- 651 36. Stone SS, Haldar JP, Tsao SC, Hwu W -m. W, Sutton BP, Liang Z-P. Accelerating  
652 advanced MRI reconstructions on GPUs. *J Parallel Distrib Comput*. 2008;68: 1307–1318.  
653 doi:10.1016/j.jpdc.2008.05.013
- 654 37. Yan KS, Yan S, Farooq A, Han A, Zeng L, Zhou M-M. Structure and conserved RNA binding  
655 of the PAZ domain. *Nature*. 2003; doi:10.1038/nature02129
- 656 38. Song JJ, Smith SK, Hannon GJ, Joshua-Tor L. Crystal structure of argonaute and its  
657 implications for RISC slicer activity. *Science (80- )*. 2004; doi:10.1126/science.1102514
- 658 39. Cora E, Pandey RR, Xiol J, Taylor J, Sachidanandam R, McCarthy AA, et al. The MID-PIWI  
659 module of Piwi proteins specifies nucleotide- and strand-biases of piRNAs. *RNA*. 2014;  
660 doi:10.1261/rna.044701.114

- 661 40. Stein CB, Genzor P, Mitra S, Elchert AR, Ipsaro JJ, Benner L, et al. Decoding the 5'  
662 nucleotide bias of PIWI-interacting RNAs. *Nat Commun.* Springer US; 2019;10: 828.  
663 doi:10.1038/s41467-019-08803-z
- 664 41. McDonald JH, Kreitman M. Adaptive protein evolution at the *Adh* locus in *Drosophila*.  
665 *Nature.* 1991; doi:10.1038/351652a0
- 666 42. Pischedda E, Scolari F, Valerio F, Carballar-Lejarazú R, Catapano PL, Waterhouse RM, et  
667 al. Insights Into an Unexplored Component of the Mosquito Repeatome: Distribution and  
668 Variability of Viral Sequences Integrated Into the Genome of the Arboviral Vector *Aedes*  
669 *albopictus*. *Front Genet.* 2019; doi:10.3389/fgene.2019.00093
- 670 43. Schirle NT, MacRae IJ. The crystal structure of human argonaute2. *Science (80- )*. 2012;  
671 doi:10.1126/science.1221551
- 672 44. Matsumoto N, Nishimasu H, Sakakibara K, Nishida KM, Hirano T, Ishitani R, et al. Crystal  
673 Structure of Silkworm PIWI-Clade Argonaute Siwi Bound to piRNA. *Cell.* 2016;  
674 doi:10.1016/j.cell.2016.09.002
- 675 45. Macias V, Coleman J, Bonizzoni M, James AA. piRNA pathway gene expression in the  
676 malaria vector mosquito *Anopheles stephensi*. *Insect Mol Biol.* 2014;23: 579–586.  
677 doi:10.1111/imb.12106
- 678 46. Bonizzoni M, Dunn WA, Campbell CL, Olson KE, Marinotti O, James AA. Complex  
679 Modulation of the *Aedes aegypti* Transcriptome in Response to Dengue Virus Infection.  
680 *PLoS One.* 2012; doi:10.1371/journal.pone.0050512
- 681 47. Campbell CL, Keene KM, Brackney DE, Olson KE, Blair CD, Wilusz J, et al. *Aedes aegypti*  
682 uses RNA interference in defense against Sindbis virus infection. *BMC Microbiol.* 2008;8: 1–  
683 12. doi:10.1186/1471-2180-8-47
- 684 48. Hess AM, Prasad AN, Ptitsyn A, Ebel GD, Olson KE, Barbacioru C, et al. Small RNA  
685 profiling of Dengue virus-mosquito interactions implicates the PIWI RNA pathway in anti-  
686 viral defense. *BMC Microbiol.* 2011; doi:10.1186/1471-2180-11-45
- 687 49. La Ruche G, Souarès Y, Armengaud A, Peloux-Petiot F, Delaunay P, Desprès P, et al. First  
688 two autochthonous dengue virus infections in metropolitan France, september 2010.  
689 *Eurosurveillance.* 2010; doi:19676 [pii]
- 690 50. Schuffenecker I, Itean I, Michault A, Murri S, Frangeul L, Vaney MC, et al. Genome  
691 microevolution of chikungunya viruses causing the Indian Ocean outbreak. *PLoS Med.*  
692 2006; doi:10.1371/journal.pmed.0030263
- 693 51. Dubrulle M, Mousson L, Moutailier S, Vazeille M, Failloux AB. Chikungunya virus and *Aedes*  
694 mosquitoes: Saliva is infectious as soon as two days after oral infection. *PLoS One.* 2009;  
695 doi:10.1371/journal.pone.0005895
- 696 52. Campbell CL, Black IV WC, Hess AM, Foy BD. Comparative genomics of small RNA  
697 regulatory pathway components in vector mosquitoes. *BMC Genomics.* 2008;9.

- 698 doi:10.1186/1471-2164-9-425
- 699 53. Arensburger P, Hice RH, Wright JA, Craig NL, Atkinson PW. The mosquito *Aedes aegypti*  
700 has a large genome size and high transposable element load but contains a low proportion  
701 of transposon-specific piRNAs. *BMC Genomics*. 2011;12. doi:10.1186/1471-2164-12-606
- 702 54. Yuan JS, Burris J, Stewart NR, Mentewab A, Neal CN. Statistical tools for transgene copy  
703 number estimation based on real-time PCR. *BMC Bioinformatics*. 2007;8: 1–12.  
704 doi:10.1186/1471-2105-8-S7-S6
- 705 55. Baruffi L, Damiani G, Guglielmino CR, Bandii C, Malacrida AR, Gasperi G. Polymorphism  
706 within and between populations of ceratitis: Comparison between RAPD and multilocus  
707 enzyme electrophoresis data. *Heredity (Edinb)*. 1995;74: 425–437. doi:10.1038/hdy.1995.60
- 708 56. Edgar RC. MUSCLE: Multiple sequence alignment with high accuracy and high throughput.  
709 *Nucleic Acids Res*. 2004; doi:10.1093/nar/gkh340
- 710 57. Li H. Aligning sequence reads, clone sequences and assembly contigs with BWA-MEM.  
711 2013; Available: <https://arxiv.org/abs/1303.3997>
- 712 58. Garrison E, Marth G. Haplotype-based variant detection from short-read sequencing -- Free  
713 bayes -- Variant Calling -- Longranger. *arXiv Prepr arXiv12073907*. 2012;  
714 doi:arXiv:1207.3907 [q-bio.GN]
- 715 59. Cingolani P, Platts A, Wang LL, Coon M, Nguyen T, Wang L, et al. A program for annotating  
716 and predicting the effects of single nucleotide polymorphisms, SnpEff: SNPs in the genome  
717 of *Drosophila melanogaster* strain w1118; iso-2; iso-3. *Fly (Austin)*. 2012;  
718 doi:10.4161/fly.19695
- 719 60. Schroeder MP, Lopez-Bigas N. muts-needle-plot: Mutations Needle Plot v0.8.0. 2015;  
720 doi:10.5281/ZENODO.14561
- 721 61. Oliveros JC. Venny. An interactive tool for comparing lists with Venn's diagrams. 2007--  
722 2015. <http://bioinfogp.cnb.csic.es/tools/venny/index.html> Accessed. 2016;
- 723 62. Flot JF. Seqphase: A web tool for interconverting phase input/output files and fasta  
724 sequence alignments. *Mol Ecol Resour*. 2010; doi:10.1111/j.1755-0998.2009.02732.x
- 725 63. Stephens M, Smith NJ, Donnelly P. A new statistical method for haplotype reconstruction  
726 from population data. *Am J Hum Genet*. 2001; doi:10.1086/319501
- 727 64. Stephens M, Scheet P. Accounting for Decay of Linkage Disequilibrium in Haplotype  
728 Inference and Missing-Data Imputation. *Am J Hum Genet*. 2005; doi:10.1086/428594
- 729 65. Librado P, Rozas J. DnaSP v5: A software for comprehensive analysis of DNA  
730 polymorphism data. *Bioinformatics*. 2009; doi:10.1093/bioinformatics/btp187
- 731 66. Tajima F. Evolutionary relationship of DNA sequences in finite populations. *Genetics*. 1983;
- 732 67. Watterson GA. On the number of segregating sites in genetical models without  
733 recombination. *Theor Popul Biol*. 1975; doi:10.1016/0040-5809(75)90020-9
- 734 68. Tajima F. Statistical method for testing the neutral mutation hypothesis by DNA

- 735 polymorphism. *Genetics*. 1989;
- 736 69. Abascal F, Zardoya R, Telford MJ. TranslatorX: Multiple alignment of nucleotide sequences  
737 guided by amino acid translations. *Nucleic Acids Res*. 2010; doi:10.1093/nar/gkq291
- 738 70. Thompson JD, Higgins DG, Gibson TJ. CLUSTAL W: Improving the sensitivity of  
739 progressive multiple sequence alignment through sequence weighting, position-specific gap  
740 penalties and weight matrix choice. *Nucleic Acids Res*. 1994; doi:10.1093/nar/22.22.4673
- 741 71. Bernhardt SA, Simmons MP, Olson KE, Beaty BJ, Blair CD, Black WC. Rapid Intraspecific  
742 Evolution of miRNA and siRNA Genes in the Mosquito *Aedes aegypti*. *PLoS One*. 2012;7.  
743 doi:10.1371/journal.pone.0044198
- 744 72. Yang Z. PAML 4: Phylogenetic analysis by maximum likelihood. *Mol Biol Evol*. 2007;  
745 doi:10.1093/molbev/msm088
- 746 73. Xu B, Yang Z. PamX: A graphical user interface for PAML. *Mol Biol Evol*. 2013;  
747 doi:10.1093/molbev/mst179
- 748 74. Rimmer A, Phan H, Mathieson I, Iqbal Z, Twigg SRF, Wilkie AOM, et al. Integrating  
749 mapping-, assembly- and haplotype-based approaches for calling variants in clinical  
750 sequencing applications. *Nat Genet*. 2014; doi:10.1038/ng.3036
- 751 75. Lai Z, Markovets A, Ahdesmaki M, Chapman B, Hofmann O, Mcewen R, et al. VarDict: A  
752 novel and versatile variant caller for next-generation sequencing in cancer research. *Nucleic  
753 Acids Res*. 2016; doi:10.1093/nar/gkw227
- 754 76. McKenna A, Hanna M, Banks E, Sivachenko A, Cibulskis K, Kernytsky A, et al. The  
755 Genome Analysis Toolkit: a MapReduce framework for analyzing next-generation DNA  
756 sequencing data. *Genome Res*. 2010; doi:10.1101/gr.107524.110
- 757 77. Rstudio Team. RStudio: Integrated Development for R. [Online] RStudio, Inc., Boston, MA.  
758 2016. doi:10.1007/978-81-322-2340-5
- 759 78. Altschul SF, Gish W, Miller W, Myers EW, Lipman DJ. Basic local alignment search tool. *J  
760 Mol Biol*. 1990; doi:10.1016/S0022-2836(05)80360-2
- 761 79. Zimmermann L, Stephens A, Nam SZ, Rau D, Kübler J, Lozajic M, et al. A Completely  
762 Reimplemented MPI Bioinformatics Toolkit with a New HHpred Server at its Core. *J Mol  
763 Biol*. 2018; doi:10.1016/j.jmb.2017.12.007
- 764 80. Webb B, Sali A. Protein structure modeling with MODELLER. *Methods in Molecular Biology*.  
765 2017. doi:10.1007/978-1-4939-7231-9\_4
- 766 81. Schirle NT, Sheu-Gruttaduria J, Chandradoss SD, Joo C, MacRae IJ. Water-mediated  
767 recognition of t1-adenosine anchors Argonaute2 to microRNA targets. *Elife*. 2015;  
768 doi:10.7554/elife.07646
- 769 82. Emsley P, Lohkamp B, Scott WG, Cowtan K. Features and development of Coot . *Acta  
770 Crystallogr Sect D Biol Crystallogr*. 2010; doi:10.1107/s0907444910007493
- 771 83. Adams PD, Afonine P V., Bunkóczi G, Chen VB, Echols N, Headd JJ, et al. The Phenix

- 772 software for automated determination of macromolecular structures. *Methods*. 2011.  
773 doi:10.1016/j.ymeth.2011.07.005
- 774 84. Williams CJ, Headd JJ, Moriarty NW, Prisant MG, Videau LL, Deis LN, et al. MolProbity:  
775 More and better reference data for improved all-atom structure validation. *Protein Sci*. 2018;  
776 doi:10.1002/pro.3330
- 777 85. Benkert P, Künzli M, Schwede T. QMEAN server for protein model quality estimation.  
778 *Nucleic Acids Res*. 2009; doi:10.1093/nar/gkp322
- 779 86. Schrödinger L. The PyMOL molecular graphics system, version 1.8.  
780 <https://www.pymol.org/citing>. 2015;
- 781 87. Robinson JT, Thorvaldsdóttir H, Winckler W, Guttman M, Lander ES, Getz G, et al.  
782 Integrative genomics viewer. *Nature Biotechnology*. 2011. doi:10.1038/nbt.1754
- 783 88. Reynolds JA, Poelchau MF, Rahman Z, Armbruster PA, Denlinger DL. NIH Public Access.  
784 2013;58: 966–973. doi:10.1016/j.jinsphys.2012.04.013.Transcript
- 785 89. Khan A, Rayner GD. Robustness to non-normality of common tests for the many-sample  
786 location problem. *J Appl Math Decis Sci*. 2004; doi:10.1155/S1173912603000178
- 787 90. Blanca MJ, Alarcón R, Arnau J, Bendayan R. Non-normal data: Is ANOVA still a valid  
788 option? *Psicothema*. 2017; doi:10.7334/psicothema2016.383
- 789 91. Ashkenazy H, Erez E, Martz E, Pupko T, Ben-Tal N. ConSurf 2010: Calculating evolutionary  
790 conservation in sequence and structure of proteins and nucleic acids. *Nucleic Acids Res*.  
791 2010; doi:10.1093/nar/gkq399
- 792 92. Madeira F, Park, Y M, Lee J, Buso N, Gur T, Madhusoodanan N, et al. The EMBL-EBI  
793 search and sequence analysis tools APIs in 2019. *Nucleic Acids Res*. 2019;
- 794 93. Robert X, Gouet P. Deciphering key features in protein structures with the new ENDscript  
795 server. *Nucleic Acids Res*. 2014; doi:10.1093/nar/gku316  
796  
797

798

## Figure legends

799

**Figure 1. Gene and transcript structure of *Ae. albopictus Piwi5* and *Piwi7*.** A) Schematic

800

representation of the DNA structure of *Piwi5* and *Piwi7* genes and their corresponding transcripts

801

as obtained from cDNA amplification of single sugar-fed mosquito samples. Exons and introns are

802

shown by blue boxes and black lines, respectively, with corresponding length in nucleotide below

803

each. The positions of the predicted PAZ, MID and PIWI domains are shown by green, blue and

804

magenta ovals, respectively. Exon numbers correspond to lane numbers. B) Amplification of each

805

exon of *Piwi5* and *Piwi7* on genomic DNA. Exon numbers correspond to lane numbers. C)

806

Northern-blot results of *Piwi5* indicate the presence of a transcript of 3 kb.

807

**Figure 2. Venn diagrams showing the number of positions harbouring synonymous and**

808

**non-synonymous mutations in tested samples for each *Piwi* gene.**

809

**Figure 3. Volcano plot.** Level of polymorphism (LoP) comparison between slow-evolving genes

810

(SGs), fast-evolving genes (FGs) and *Piwi* genes by population. Genes on the right side of the

811

panel have LoP values greater than those of SGs, while genes on the left side have LoPs smaller

812

than SGs. The y-axis represents the  $-\log_{10}$  p-values of the Kolmogorov-Smirnov test. Faint

813

datapoints are not significant after Bonferroni correction for multiple testing ( $-\log_{10} 0.0024 (0.05/21$

814

genes) = 2.62).

815

**Figure 4. Computational homology models of the *Ae. Albopictus Piwi* proteins.** Homology

816

models were generated for the seven *Piwi* genes as described in the methods section. A)

817

Superposition of cartoon representations of *Piwi* homology models, with highlight of domain

818

organization: the N-terminal domain is shown in orange, the PAZ domain in green, the MID domain

819

in blue and the PIWI domain in magenta. B) *CONSURF* [91] overview of the amino acid sequence

820

conservation mapped on three-dimensional homology models in a putative RNA-bound

821

arrangement based on the structure of human Argonaute bound to a target RNA (PDB ID 4Z4D),

822

coloured from teal (very low conservation) to dark magenta (highly conserved).

823

**Figure 5. Expression profile of *Piwi* genes.** Heatmap representations of  $\log_{10}$  transformed fold-

824

change expression values of each *Piwi* gene. A) Developmental expression pattern of the *Piwi*

825 genes normalized on expression in early embryos (4-8h). B) Expression pattern of *Piwi* genes  
826 following viral infection normalized with respect to sugar-fed samples. Expression was verified in  
827 ovaries and carcasses separately, during the early and late stages of infections, that is 4 days post  
828 infection for both viruses and 14 or 21 dpi for CHIKV and DENV, respectively. Each day post  
829 infection was analysed with respect to sugar and blood-fed controls of the same day. \* indicates  
830 significant difference ( $P < 0.05$ ) between infected samples and the corresponding blood-fed control.



831 **Fig. 1**

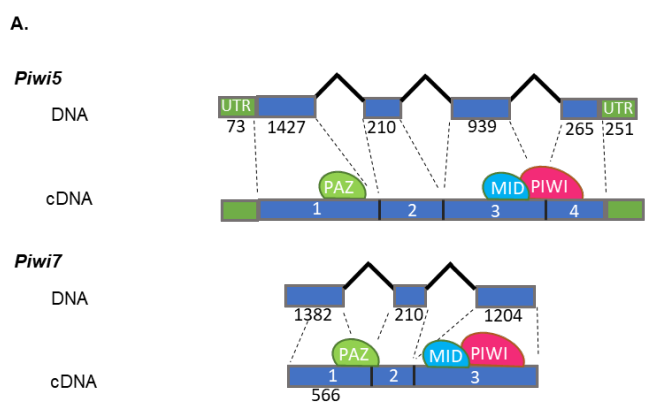

**B.**

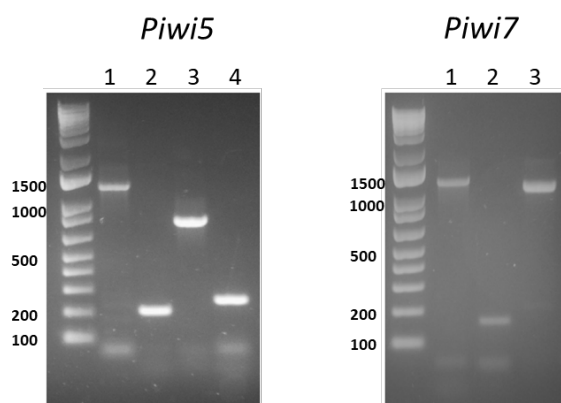

**C.**

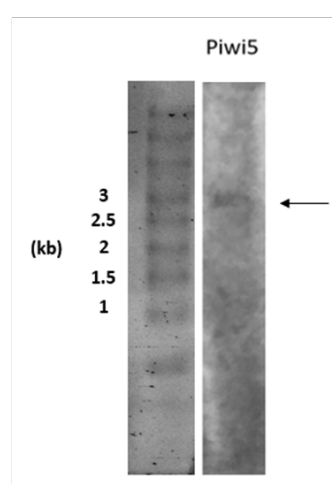

832 Fig. 2

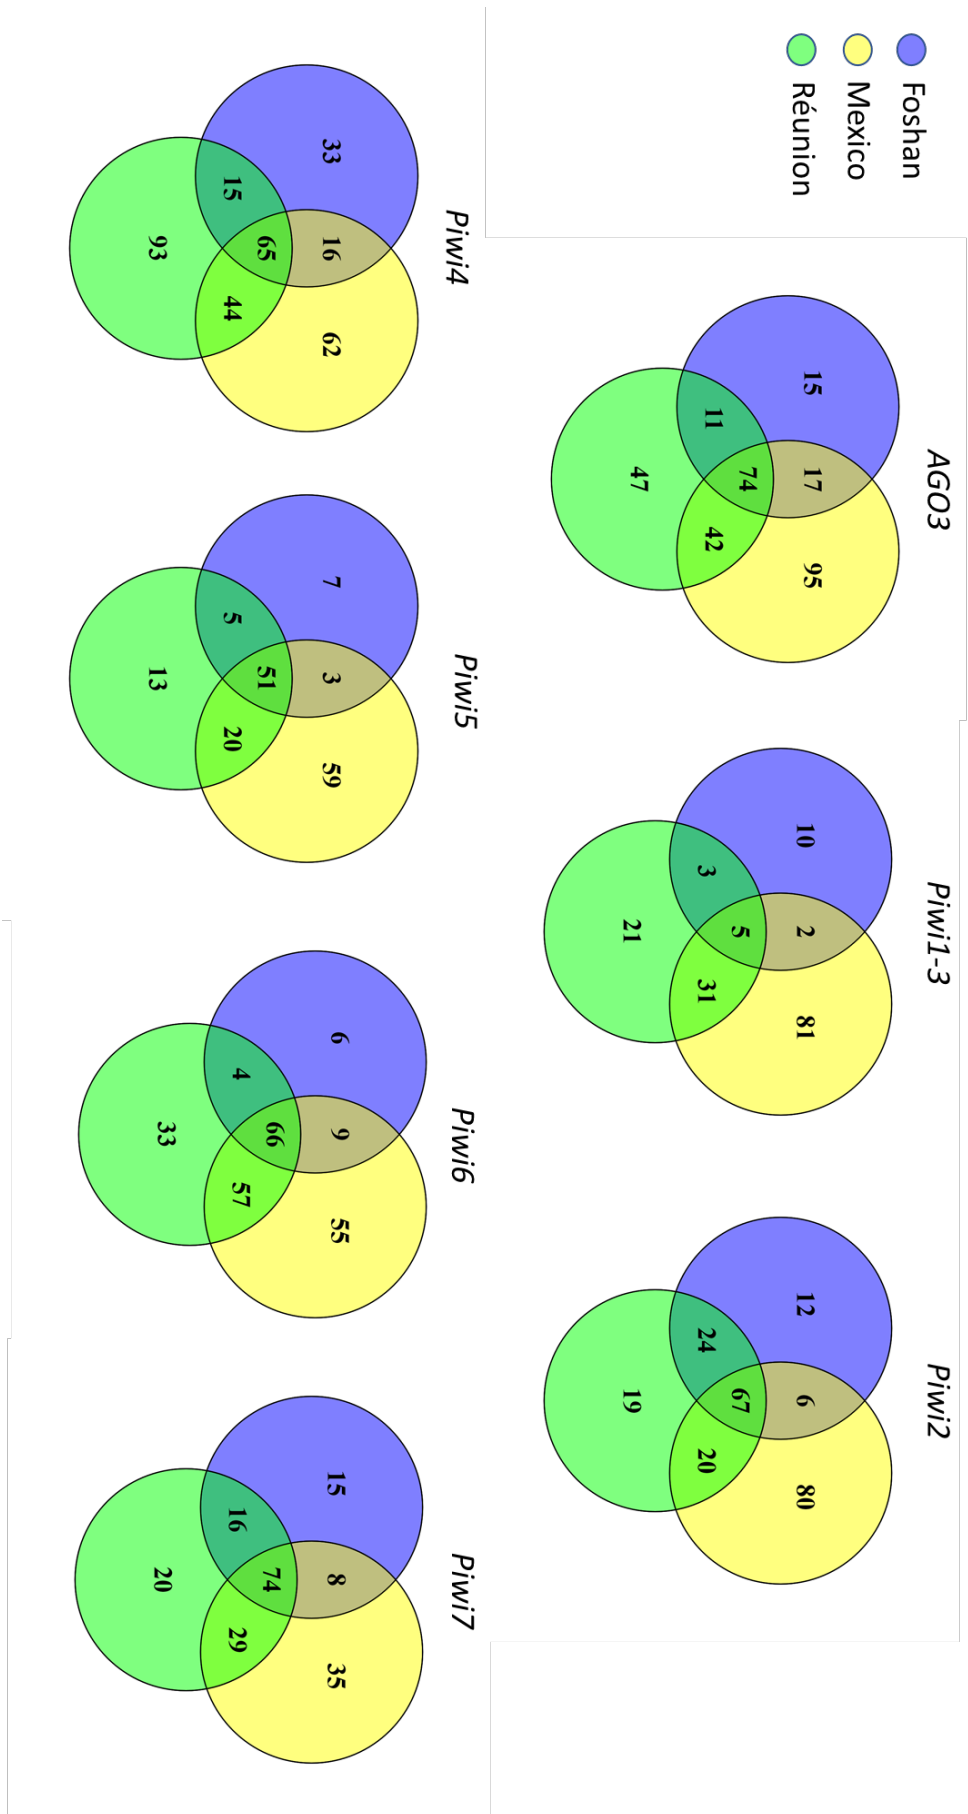

833 Fig. 3

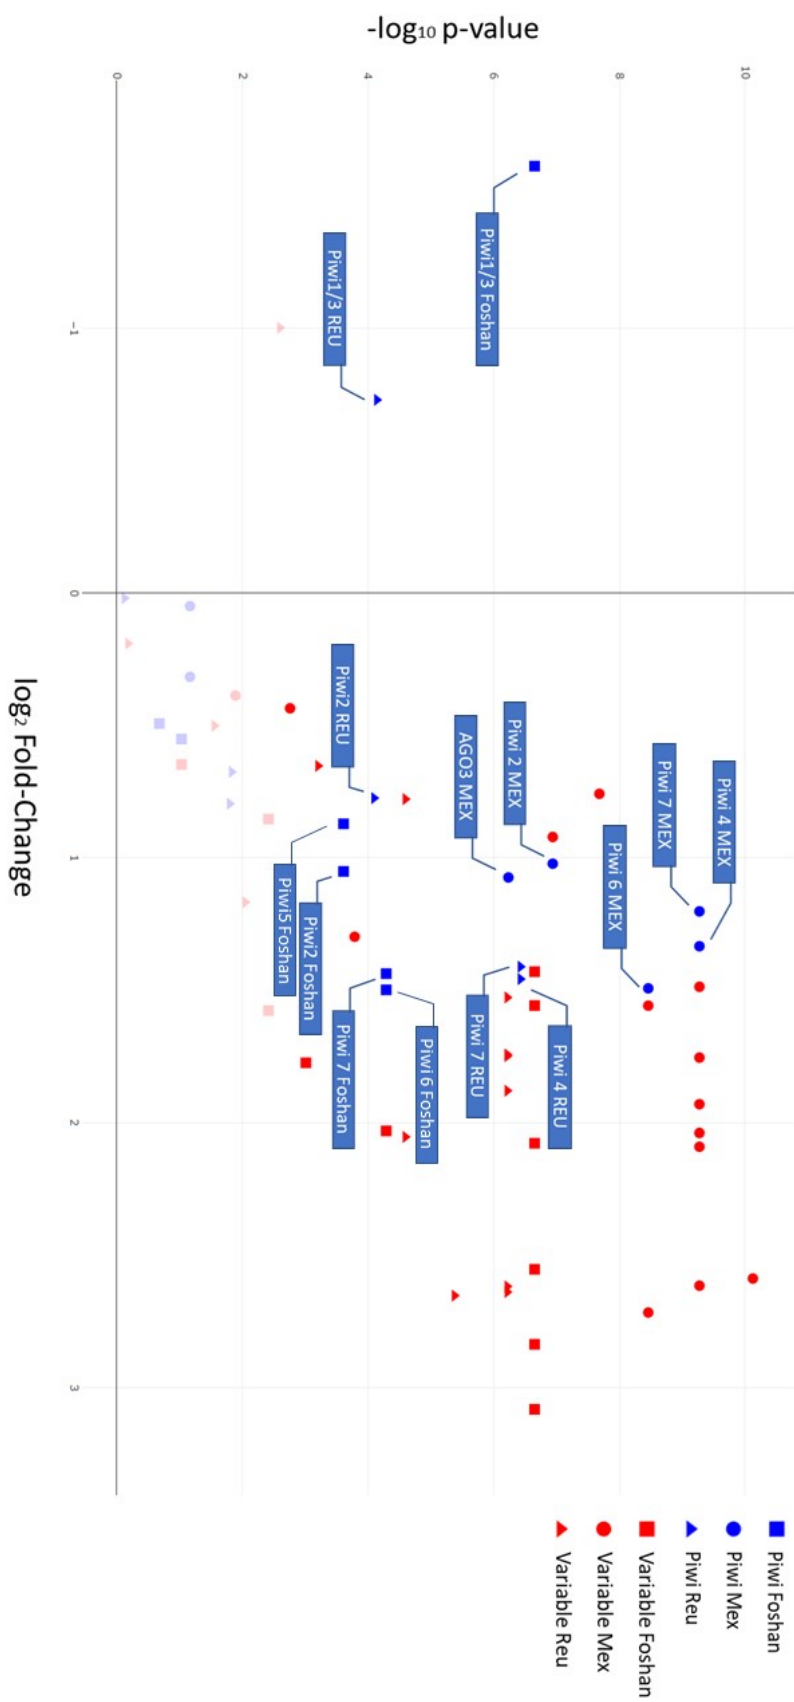

834 Fig. 4

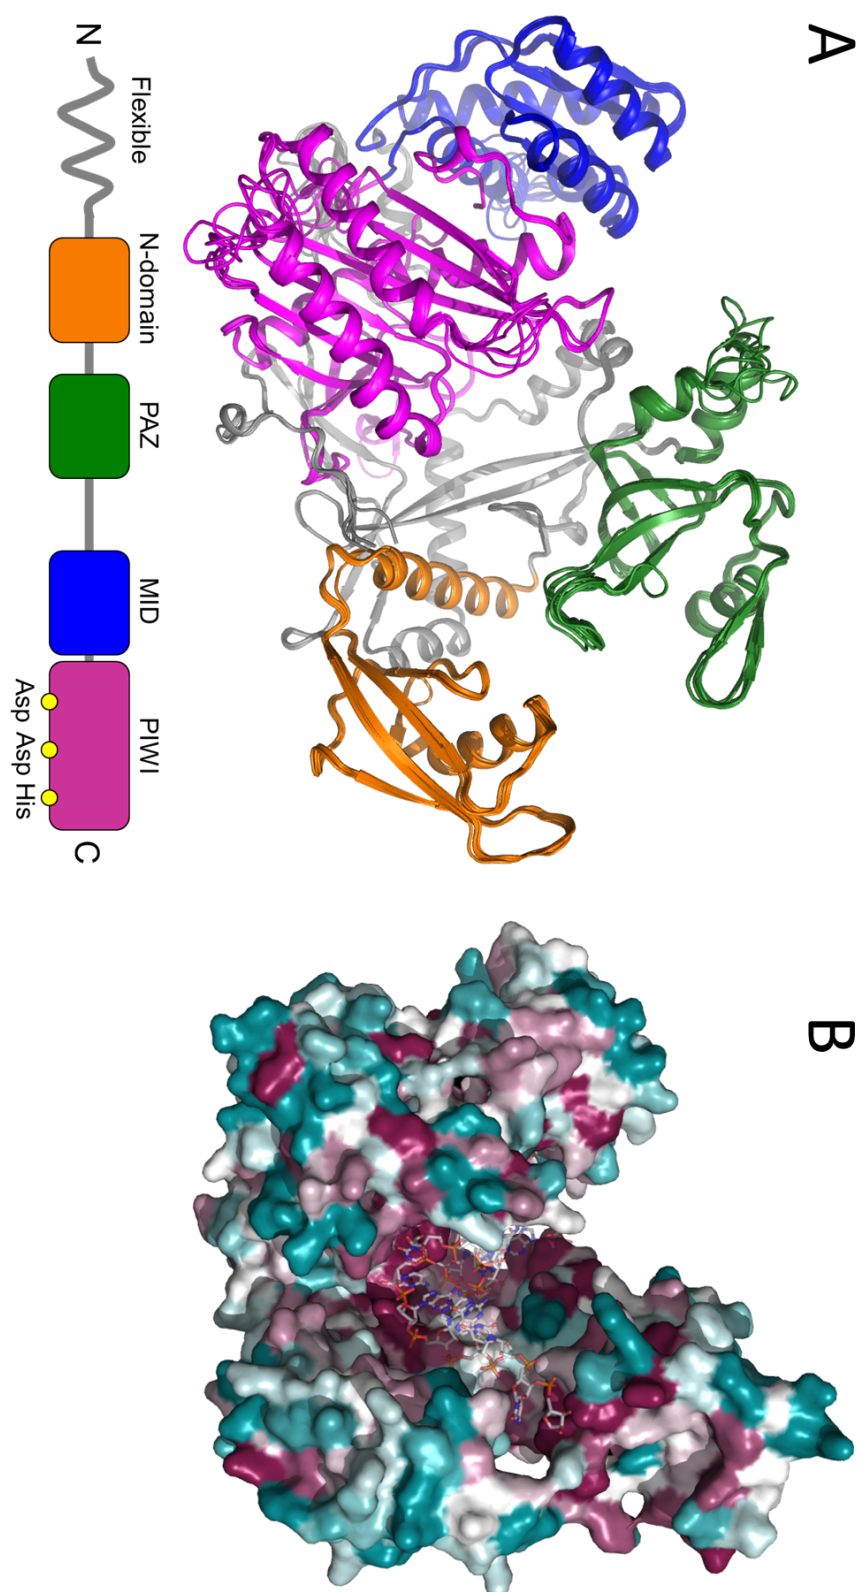

835 **Fig. 5**

**A.**

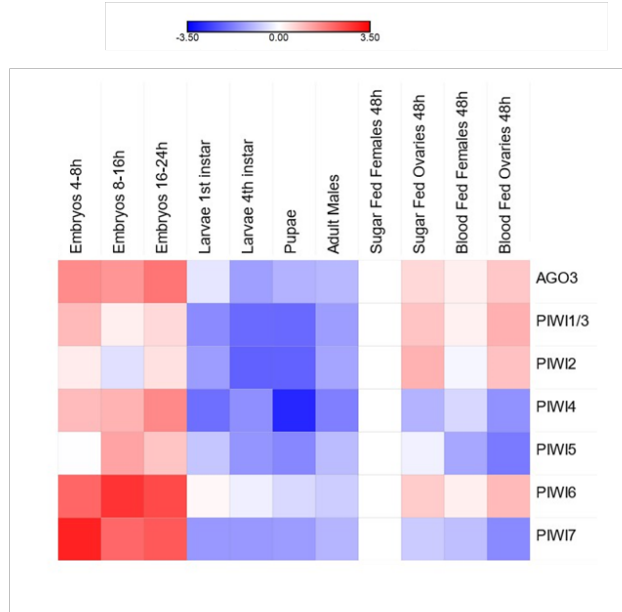

**B.**

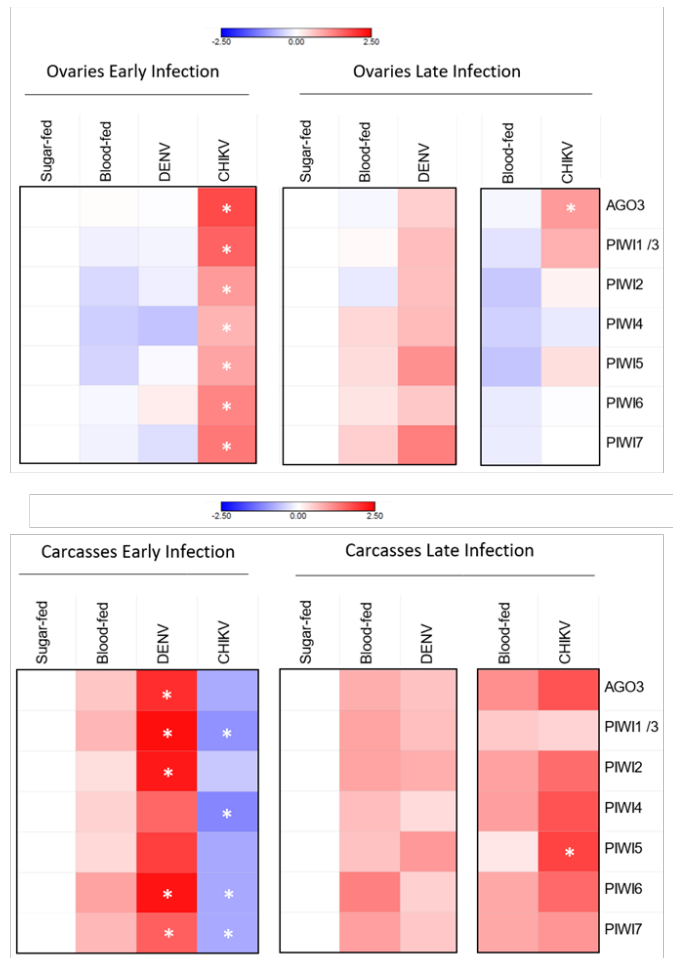

836

## Supporting information

837 **S1 Table.** List of the core components of the piRNA pathway in *Ae. aegypti* and their orthologous in  
838 *Ae. albopictus*.

839 **S2 Table.** List of Transcript IDs and abbreviations of the Culicidae and Drosophilidae species  
840 included in the phylogenetic analyses.

841 **S3 Table.** Number of non-synonymous mutations found in mosquitoes of the Foshan strain (Foshan)  
842 and wild-caught samples from Mexico (Mex) and the island of La Reunion (Reu) divided by type (i.e.  
843 missense [M] , frameshift [F], indel [I] and nonsense [N]) and number of sites in which

844 **S4 Table.** Relative expression values (log<sub>10</sub> fold-change) of Piwi genes during development (A) and  
845 following viral infection (B) normalized with respect to sugar-fed samples. Samples (2 pools per  
846 condition, 15 individuals each) were analysed at 4 days post infection (early infection) and at 14 and  
847 21 days post infection for CHIKV and DENV, respectively (late infection). Each condition was  
848 normalized to the corresponding Sugar-fed control and compared to the corresponding Blood-fed  
849 control. Ovaries and carcasses were analysed independently. \* indicates statistically significant  
850 difference between infected and non-infected blood-fed samples (ANOVA framework). Relative  
851 expression values may mask differences in levels of expression. For instance, the Ct values of Piwi6,  
852 Piwi7 and Piwi1/3 in ovaries 4 days post infection with CHIKV were 30, 33.39 and 25.20, respectively.  
853 Ovaries of blood-fed samples at the same time point showed Ct values of 30.30, 33.93 and 26.55  
854 for Piwi6, Piwi7 and Piwi1/3. When relative expression was calculated with respect to Ct values of  
855 RPL34, fold-changes in gene expression were comparable among the three genes in both  
856 conditions, but Ct values clearly indicate that Piwi7 is less expressed than both Piwi1/3 and Piwi6.  
857 These considerations were taken into account when describing results.

858 **S5 Table.** List of primers used for CDS analyses, copy number estimation, qPCR experiments and  
859 Northern Blot probe design.

860 **S1 Dataset.** CDS of the seven *Piwi* genes of *Ae. albopictus*. The sequence of the **PAZ**, MID and  
861 *PIWI* domains is in **bold**, underline and **bold-italics**, respectively.

862 **S1 Fig. Maximum likelihood cladogram generated from the alignment of transcript sequences**  
863 **of annotated *Piwi* genes in Culicinae.** Transcript IDs and species abbreviations are as listed in S2  
864 Table. AlbPiwi3 is the same as Piwi1/3 in the text. *Piwi* gene transcripts from *Ae. albopictus* are in  
865 red, from *Ae. aegypti* in purple, from *Culex quinquefasciatus* in pink. Transcripts from *D.*  
866 *melanogaster* *Ago3*, *Piwi* and *Aubergine* genes are included for reference and shown in blue. All  
867 nodes were supported by bootstrap values higher than 50% with the exception of the three nodes  
868 with a black dot.

869 **S2 Fig. Polymorphism of *Piwi4* and *Piwi5*.** Lollipop plots representing position, amount and type  
870 of mutation along the coding sequences of *Piwi4* and *Piwi5* in mosquitoes of the Foshan strain, from  
871 la Reunion Island (Reu) and Mexico (Mex) as inferred by FreeBayes and SnpEFF analyses. Only  
872 missense (blue), nonsense (red) and indels (orange) and frameshift (yellow) are shown. The PAZ,  
873 MID and PIWI domains are shown in green, blue and magenta, respectively. DDH residues positions  
874 are highlighted in the PIWI domain.

875 **S3 Fig.** Sequence alignment of *Aedes albopictus* *Piwi* proteins. Domain boundaries inferred from  
876 structural predictions are highlighted by coloured lines using the same colour coding as in figure 4  
877 (Orange: N-terminus; Green: PAZ; Blue: MID; Magenta: PIWI). Conserved DDH residues found in  
878 PIWI are indicated by (▲). The “acc” line indicates relative solvent accessibility, ranging from blue  
879 (accessible) to white (buried). The sequence alignment was generated using EBI muscle [92] and  
880 depicted using ESPRIPT3 [93]

881
